# Supplementary material for: C9-Aryl-substituted berberine derivatives with tunable AIE properties for cell imaging application
Source: Royal Society of Chemistry journal article supplement (doi:10.1039/d4ob00685b), 2024-01-01
Supplement: d4ob00685b1.pdf [file d4ob00685b1.pdf]

# C9-Aryl-substituted berberine derivatives with tunable AIE properties for cell imaging application

Qi Meng,<sup>ab</sup> Ye Tan,<sup>a</sup> E E Sang,<sup>b</sup> Qiaoqiao Teng,<sup>a</sup> Pei Chen <sup>\*b</sup> and Yuxiang Wang<sup>\*a</sup>

<sup>a</sup>School of Petrochemical Engineering, Changzhou University, Changzhou 213164, China. E-mail: wangyx@cczu.edu.cn

<sup>b</sup>School of Pharmacy & School of Biological and Food Engineering, Changzhou University, Changzhou 213164, China. E-mail: chenpei689@cczu.edu.cn

## Table of Contents

1. Reaction optimization
2. Photophysical properties
3. MTT assay and photostability
4. NMR Spectra of all the compounds
5. HRMS Spectra of all the compounds

## 1. Reaction optimization

Table S1. Optimization of Suzuki Coupling Reaction <sup>a</sup>

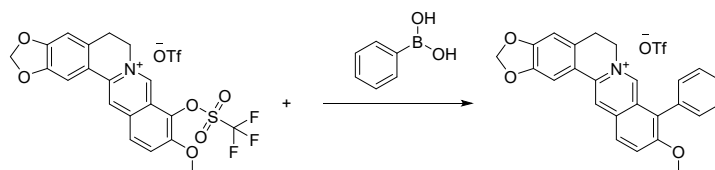

| Entry | base                            | equiv | time (h) | <i>T</i> (°C) | yield (%) |
|-------|---------------------------------|-------|----------|---------------|-----------|
| 1     | Na <sub>2</sub> CO <sub>3</sub> | 4     | 12       | 80            | 27        |
| 2     | NaHCO <sub>3</sub>              | 4     | 12       | 80            | 62        |
| 3     | NaOAc                           | 4     | 12       | 80            | 0         |
| 4     | NaHCO <sub>3</sub>              | 4     | 12       | 60            | 71        |
| 5     | NaHCO <sub>3</sub>              | 4     | 12       | 40            | 59        |
| 6     | NaHCO <sub>3</sub>              | 4     | 6        | 60            | 73        |
| 7     | NaHCO <sub>3</sub>              | 4     | 24       | 60            | 51        |
| 8     | NaHCO <sub>3</sub>              | 4     | 4        | 60            | 64        |
| 9     | NaHCO <sub>3</sub>              | 2     | 12       | 60            | 72        |
| 10    | NaHCO <sub>3</sub>              | 2     | 6        | 60            | 58        |
| 11    | NaHCO <sub>3</sub>              | 1     | 6        | 60            | 64        |
| 12    | NaHCO <sub>3</sub>              | 1     | 12       | 60            | 74        |

<sup>a</sup> Reaction conditions: 1.0 mmol of compound 1, 2.0 mmol of Phenylboronic acid (2 equiv.), 1.0 mmol of NaHCO<sub>3</sub> (1 equiv.), 0.05 mmol of tetratriphenylphosphine palladium (0.05 equiv.), 10 mL of ethanol as solvent

## 2. Photophysical properties

**Table S2.** Photophysical properties of 9-aryl berberine derivatives

| Compound  | DCM solution                |                            | Soild                      |             |                       |
|-----------|-----------------------------|----------------------------|----------------------------|-------------|-----------------------|
|           | $\lambda_{\text{abs}}$ (nm) | $\lambda_{\text{em}}$ (nm) | $\lambda_{\text{em}}$ (nm) | $\tau$ (ns) | $\Phi_{\text{F}}$ (%) |
| <b>2a</b> | 232, 268, 343, 356, 440     | 522                        | 512                        | 7.49        | 9                     |
| <b>2b</b> | 230, 268, 345, 358, 443     | 522                        | 520                        | 8.38        | 9                     |
| <b>2c</b> | 231, 267, 343, 356, 439     | 528                        | 506                        | 5.38        | 17                    |
| <b>2d</b> | 230, 268, 344, 358, 452     | 532                        | 524                        | 2.59        | 7                     |
| <b>2e</b> | 229, 266, 343, 359, 449     | 528                        | 540                        | 3.57        | -                     |
| <b>2f</b> | 231, 267, 344, 495          | 532, 744                   | 682                        | 2.35        | 10                    |
| <b>2g</b> | 231, 267, 346, 357, 456     | 537                        | 672                        | 1.01        | -                     |
| <b>2h</b> | 231, 269, 343, 358, 443     | 534                        | 510                        | 6.68        | 17                    |
| <b>2i</b> | 231, 269, 343, 358, 439     | 532                        | 508                        | 7.22        | 24                    |
| <b>2j</b> | 231, 268, 344, 356, 439     | 536                        | 524                        | 6.66        | 12                    |
| <b>2k</b> | 231, 267, 343, 359, 442     | 546                        | 536                        | 10.53       | 8                     |
| <b>2l</b> | 230, 265, 344, 357, 438     | 546                        | 547                        | 8.27        | 4                     |
| <b>2m</b> | 230, 267, 345, 356, 439     | 545                        | 578                        | 7.22        | 0.8                   |
| <b>2n</b> | 230, 268, 345, 359, 452     | 544                        | 582                        | 2.48        | -                     |
| <b>2o</b> | 231, 268, 344, 358, 454     | 656                        | 538                        | 8.80        | 20                    |
| <b>2p</b> | 231, 269, 297, 343, 489     | 470, 738                   | 612                        | 10.53       | 36                    |
| <b>2q</b> | 233, 290, 342, 358, 448     | 644                        | 546                        | 5.21        | 5                     |

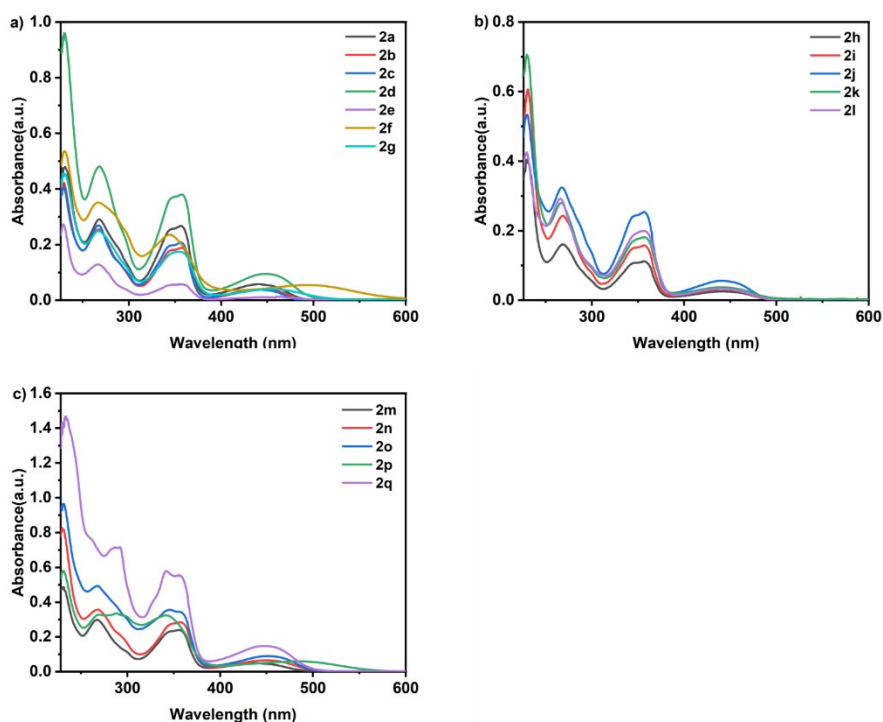

**Figure S1.** UV-vis absorption spectra of 9-aryl berberine derivatives in dichloromethane solutions (ca.  $10^{-5}$  M).

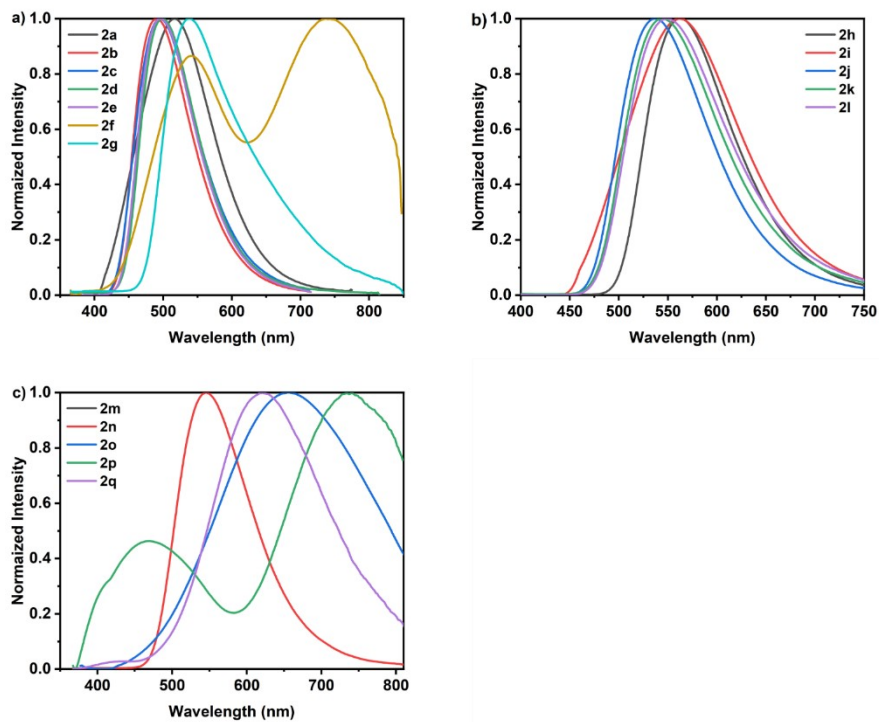

**Figure S2.** Fluorescence spectra of 9-aryl berberine derivatives in dichloromethane solutions (ca.  $10^{-5}$  M).  $\lambda_{\text{ex}}$ : 360 nm.

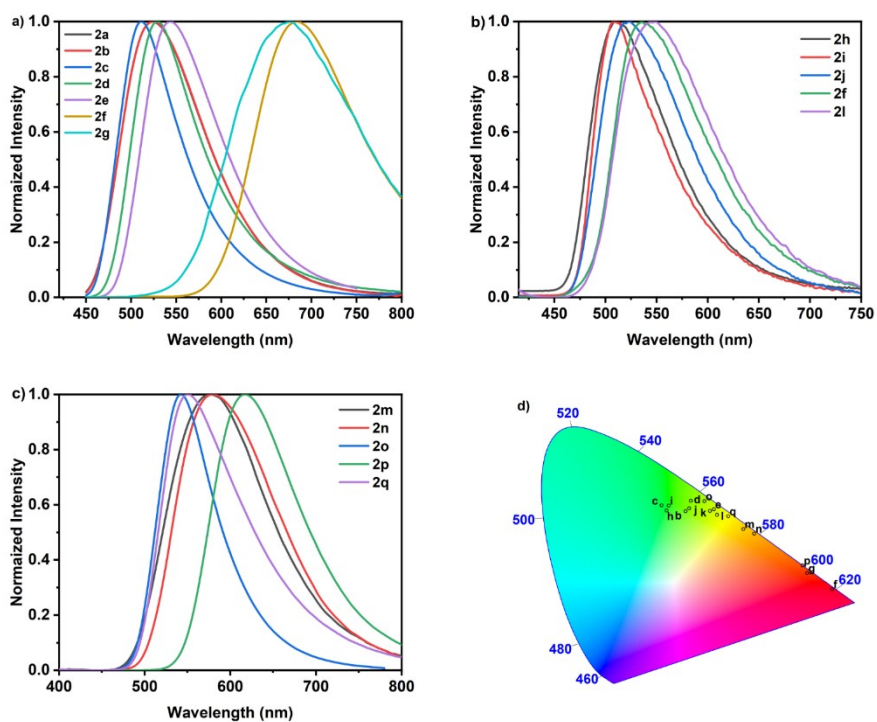

**Figure S3.** Fluorescence spectra of 9-aryl berberine derivatives in solid state.  $\lambda_{\text{ex}}$ : 360 nm.

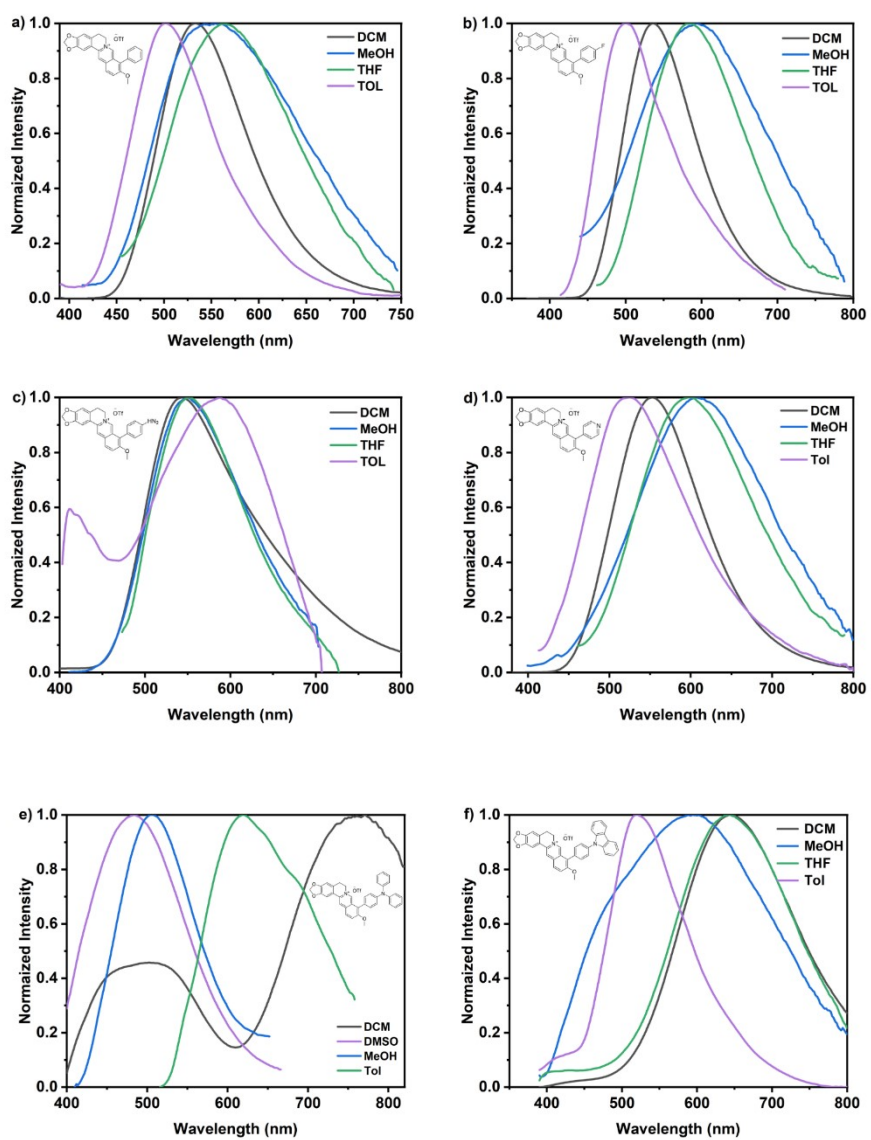

**Figure S4.** Fluorescence spectra of 9-aryl berberine derivatives in dichloromethane, MeOH, THF, DMSO and Tol solutions (ca.  $10^{-5}$  M).  $\lambda_{ex}$ : 360 nm.

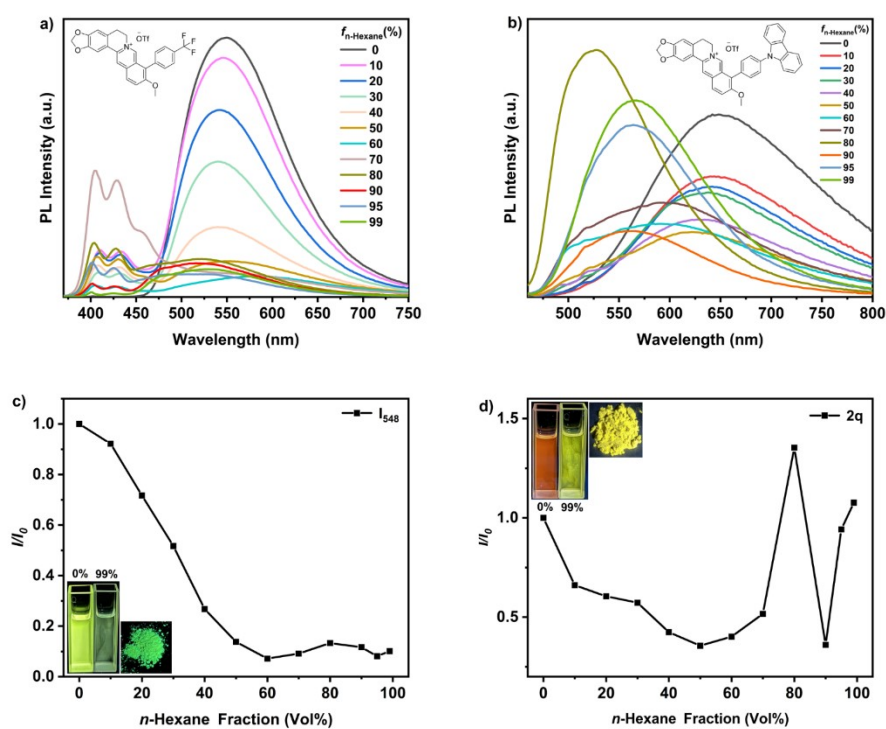

**Figure S5.** Fluorescence spectra of a) **2i** ( $\lambda_{\text{ex}}$ : 360 nm) and b) **2q** ( $\lambda_{\text{ex}}$ : 450 nm) in DCM/*n*-Hexane mixtures (*ca.*  $10^{-5}$  M) with different *n*-Hexane fraction ( $f_{\text{hex}}$  / %). The relative fluorescence intensity c) **2i** and d) **2q** to  $f_{\text{hex}}$ , inset: photographs taken under UV illumination (365 nm).

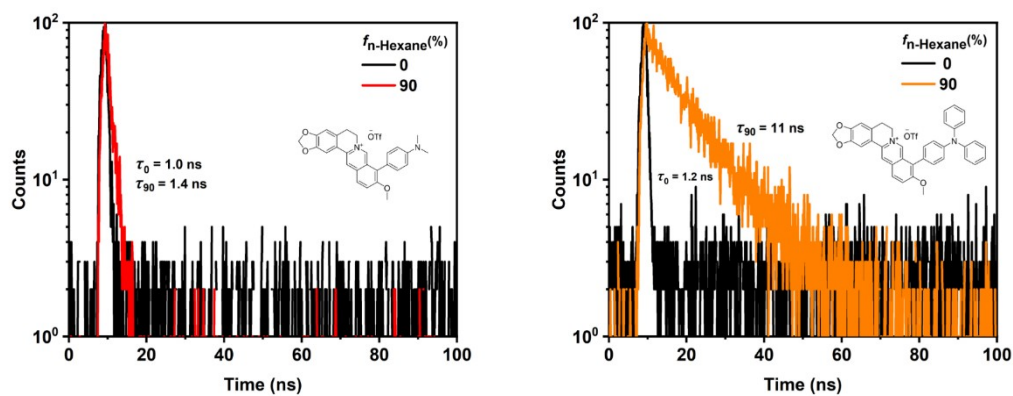

**Figure S6.** fluorescence lifetimes of **2f** and **2p** at  $f_{\text{hex}} = 0\%$  and  $90\%$ .

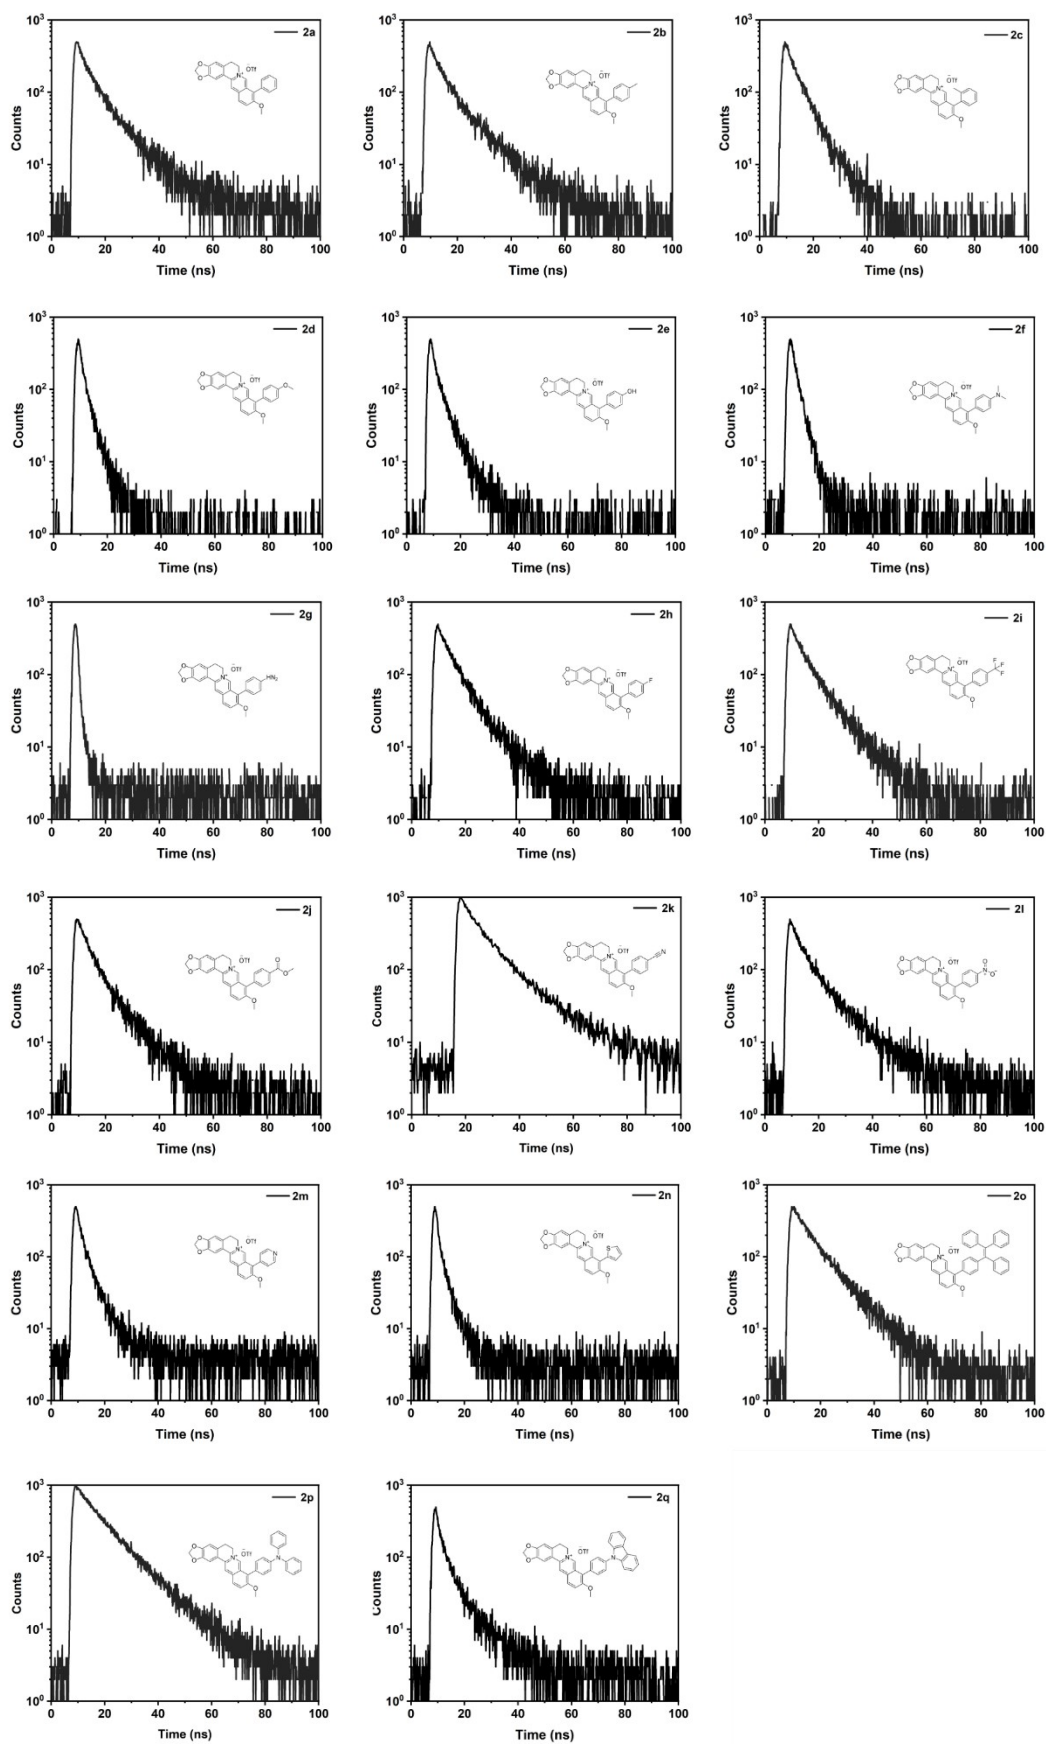

Figure S7. Fluorescence lifetime spectra of 9-aryl berberine derivatives in solid state.

**Table S3.** Photophysical properties of compounds **2f** and **2m** in the presence of different equivalences of TFA

| TFA/eqiv. | Compound                    |                            |                             |                            |
|-----------|-----------------------------|----------------------------|-----------------------------|----------------------------|
|           | <b>2f</b>                   |                            | <b>2m</b>                   |                            |
|           | $\lambda_{\text{abs}}$ (nm) | $\lambda_{\text{em}}$ (nm) | $\lambda_{\text{abs}}$ (nm) | $\lambda_{\text{em}}$ (nm) |
| 0         | 244, 264, 285, 344, 492     | 532, 752                   | 231, 265, 345, 355, 440     | 546                        |
| 0.1       | 240, 265, 285, 344, 492     | 532, 754                   | 233, 265, 344, 355, 440     | 546                        |
| 0.2       | 230, 265, 285, 344, 497     | 544                        | 233, 264, 354, 440          | 560                        |
| 0.5       | 232, 240, 266, 347, 443     | 552                        | 232, 264, 353, 439          | 568                        |
| 0.8       | 231, 266, 345, 354, 440     | 556                        | 232, 264, 354, 440          | 572                        |
| 1         | 231, 267, 345, 354, 441     | 556                        | 232, 263, 354, 438          | 570                        |
| 2         | 231, 267, 344, 354, 438     | 566                        | 231, 263, 354, 440          | 582                        |
| 3         | 232, 267, 344, 354, 437     | 566                        | 231, 263, 354, 441          | 578                        |
| 4         | 230, 266, 344, 355, 438     | 566                        | 231, 264, 354, 438          | 582                        |
| 5         | 231, 267, 344, 355, 438     | 568                        | 231, 263, 354, 439          | 584                        |



### 3. MTT assay and photostability

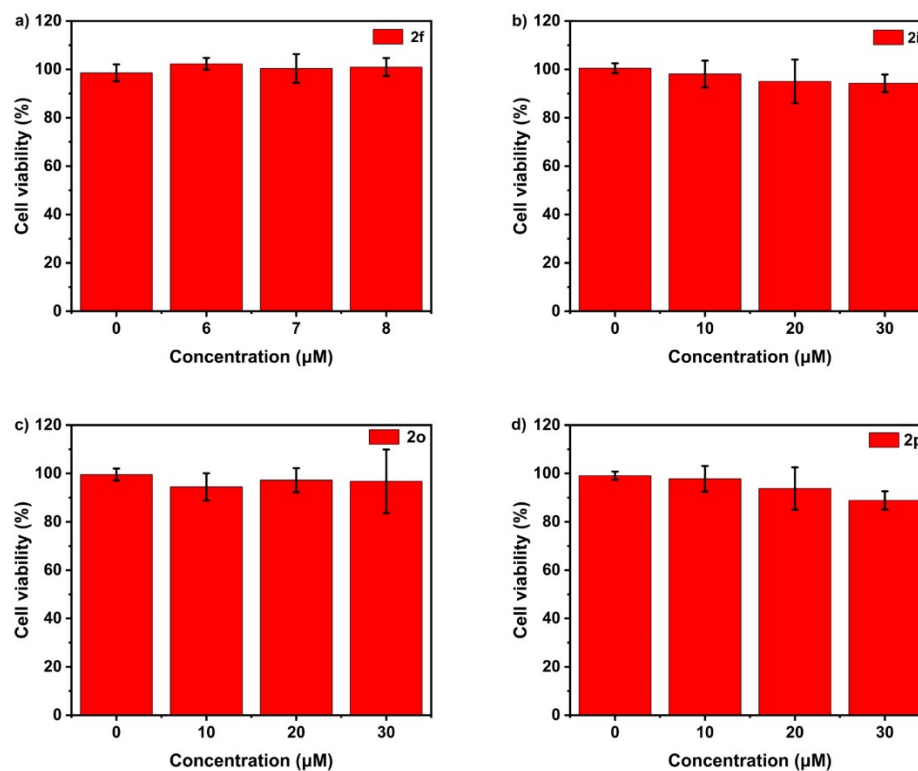

**Figure S8.** Viability of Caco-2 cells in the presence of different concentrations of *2f*, *2i*, *2o* and *2p* for 24 h. Data were tested at 570 nm expressed as mean value of three separate trials.

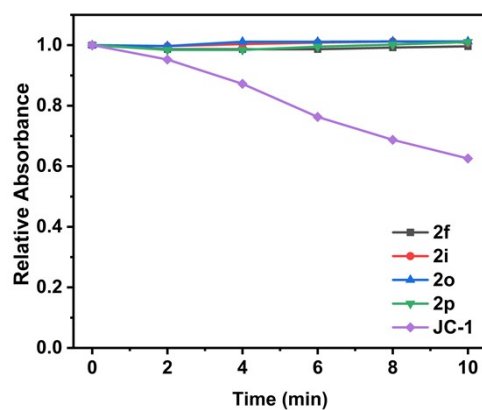

**Figure S9.** The relative absorbance intensity of *2f*, *2i*, *2o*, *2p* and *JC-1* in the molecular state before and after UV irradiation (385 nm, 0.71 W cm<sup>-2</sup>).

## 4. NMR Spectra of all the compounds

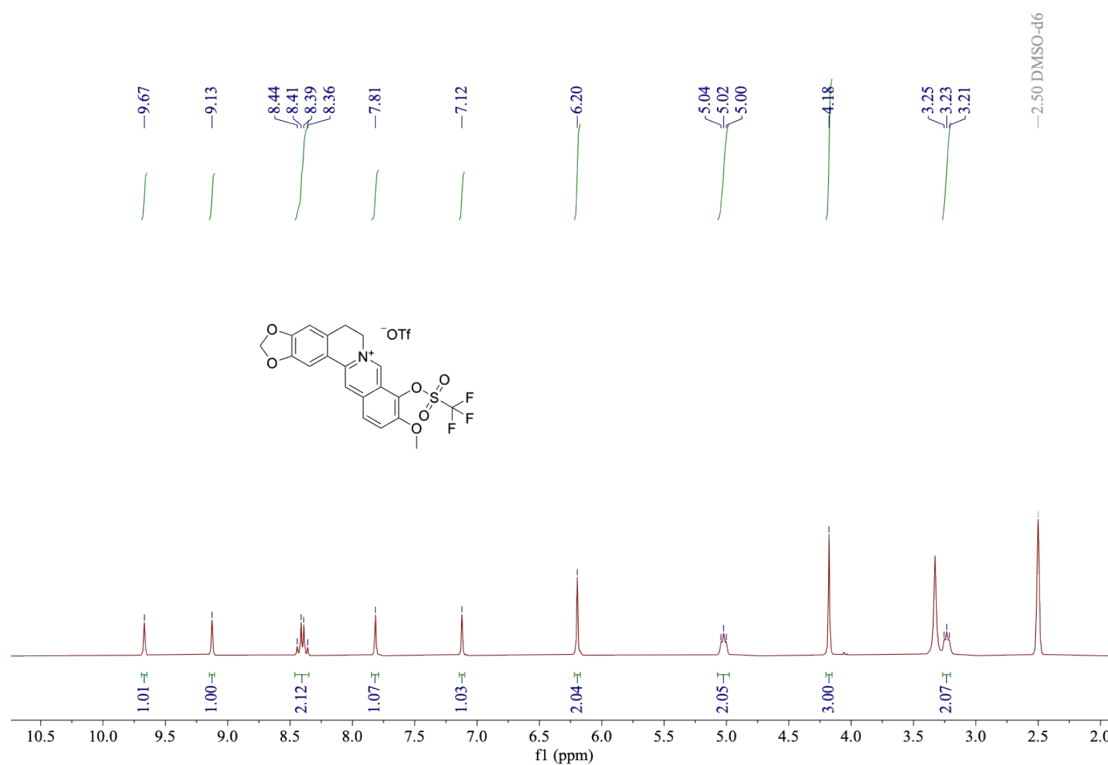

Figure S10.  $^1\text{H}$  NMR spectrum of *compound 1* (300 MHz, DMSO- $d_6$ ).

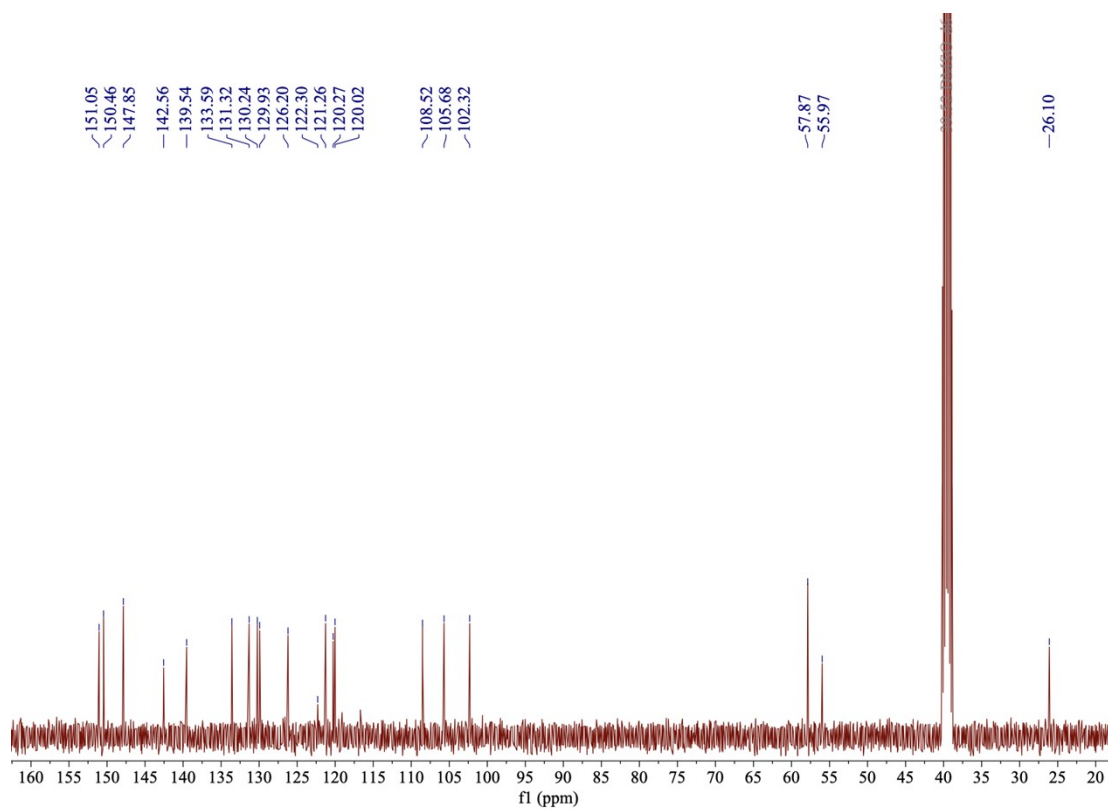

Figure S11.  $^{13}\text{C}$  NMR spectrum of *compound 1* (101 MHz, DMSO- $d_6$ ).

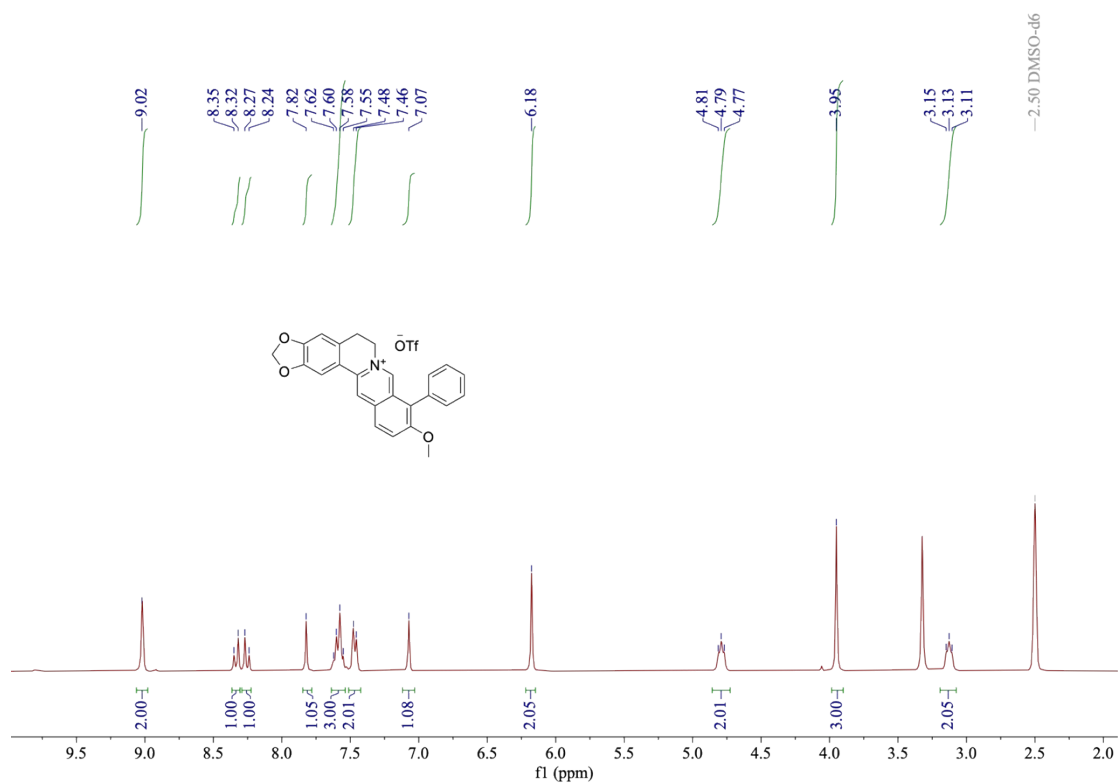

**Figure S12.** <sup>1</sup>H NMR spectrum of **2a** (300 MHz, DMSO-*d*<sub>6</sub>).

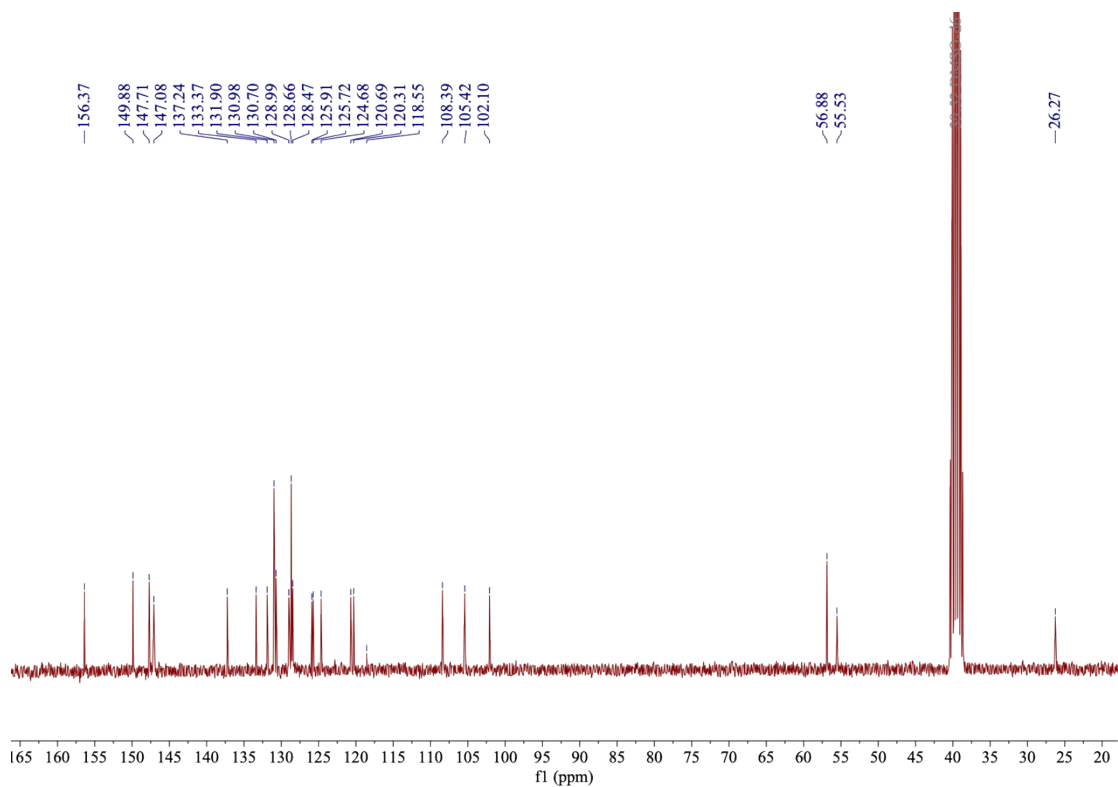

**Figure S13.** <sup>13</sup>C NMR spectrum of **2a** (75 MHz, DMSO-*d*<sub>6</sub>).

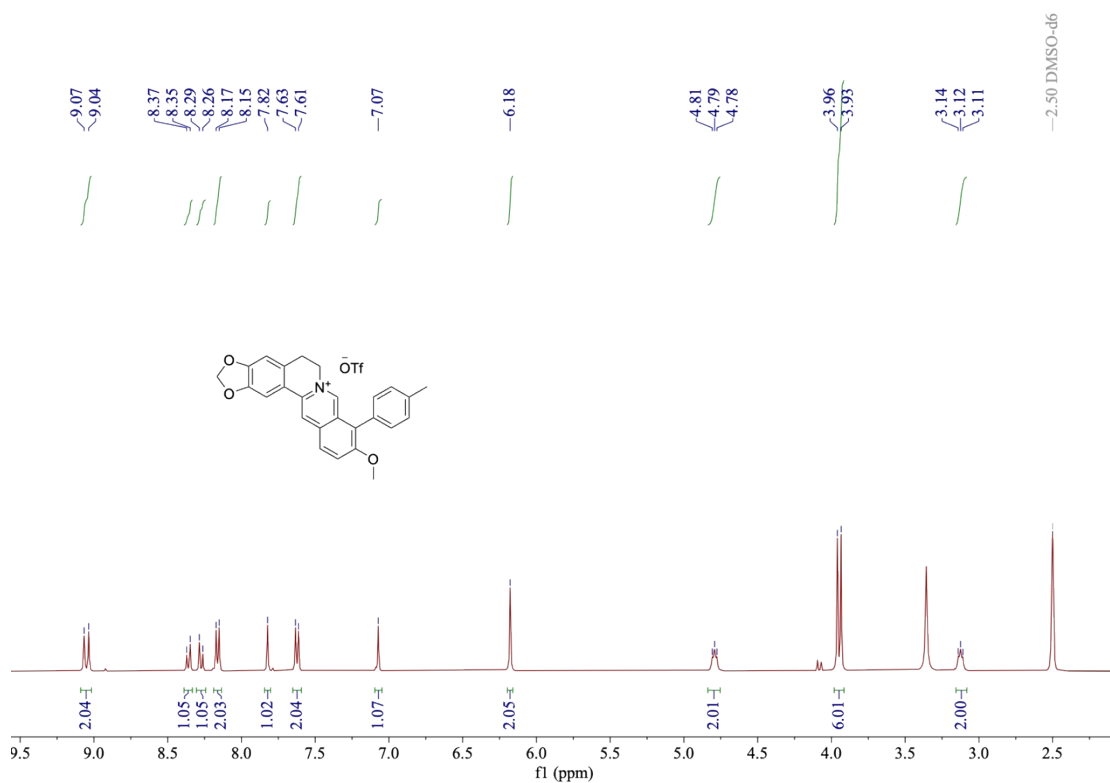

Figure S14. <sup>1</sup>H NMR spectrum of **2b** (400 MHz, DMSO-*d*<sub>6</sub>).

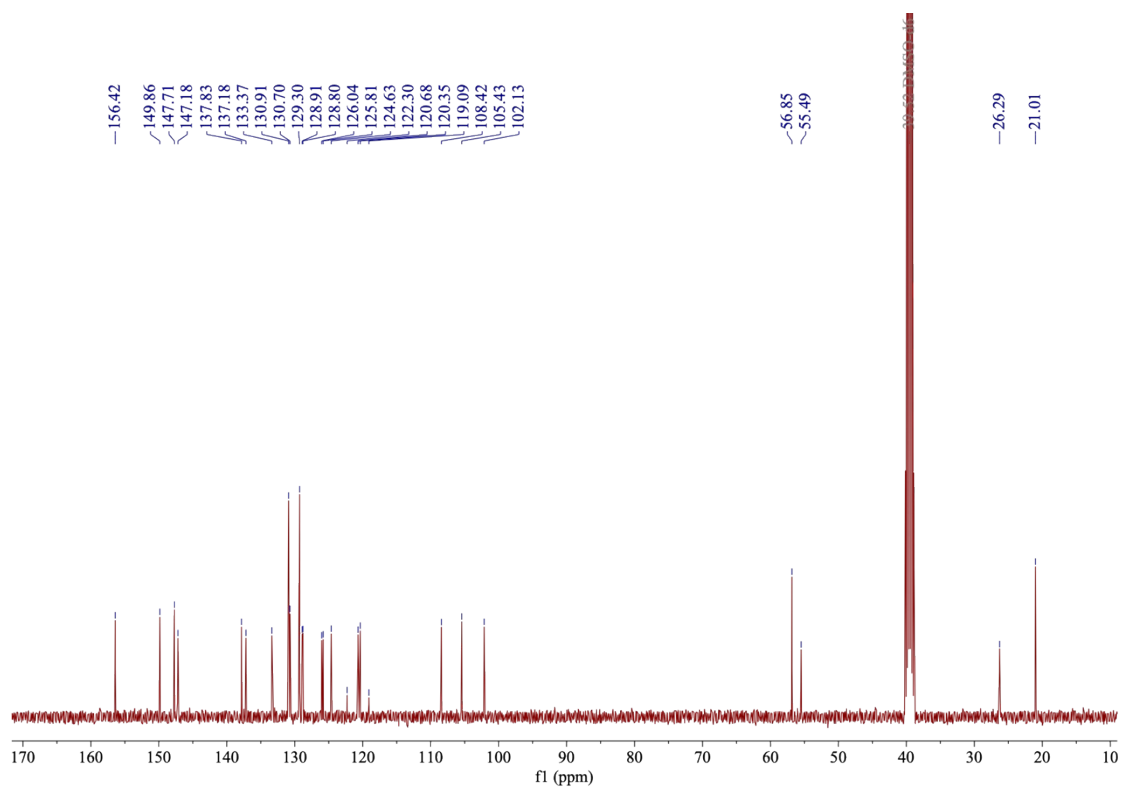

Figure S15. <sup>13</sup>C NMR spectrum of **2b** (101 MHz, DMSO-*d*<sub>6</sub>).



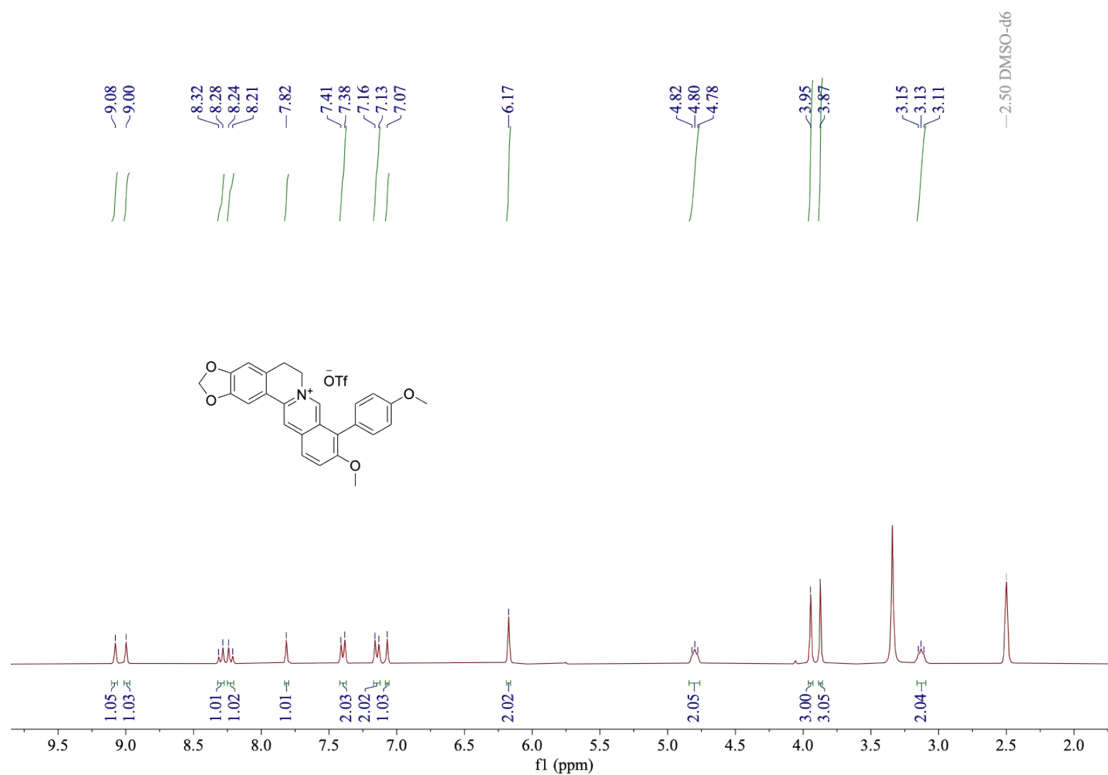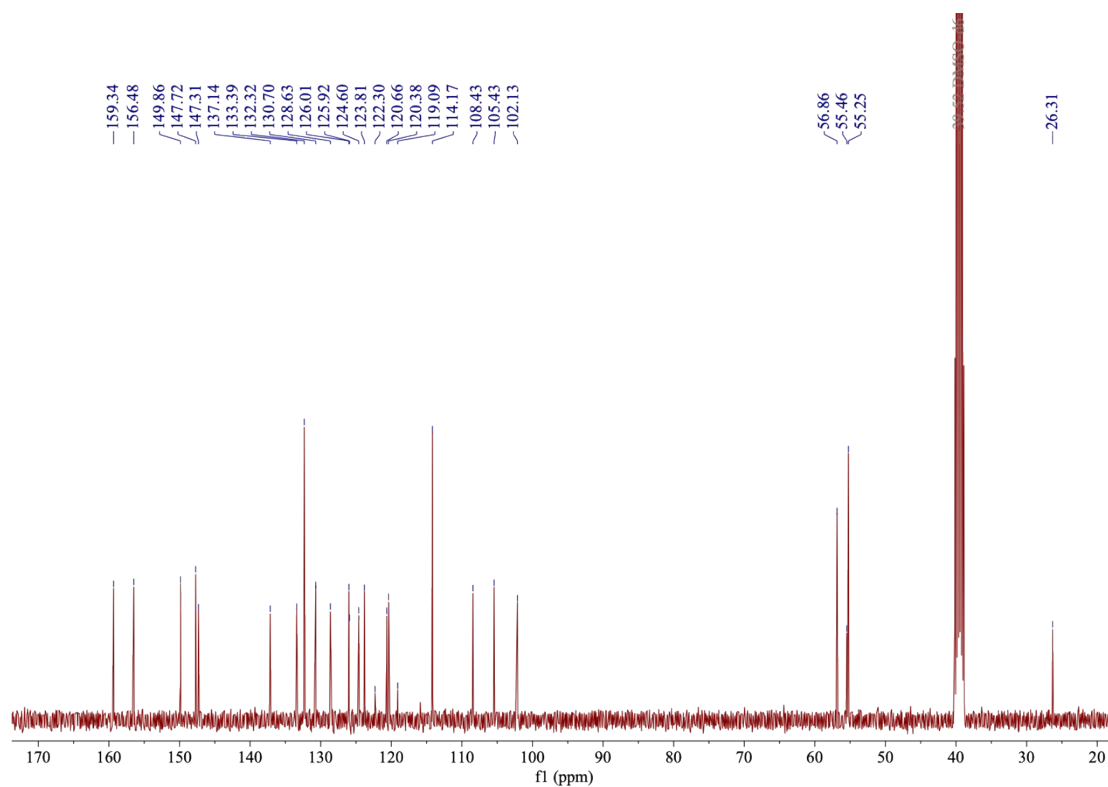

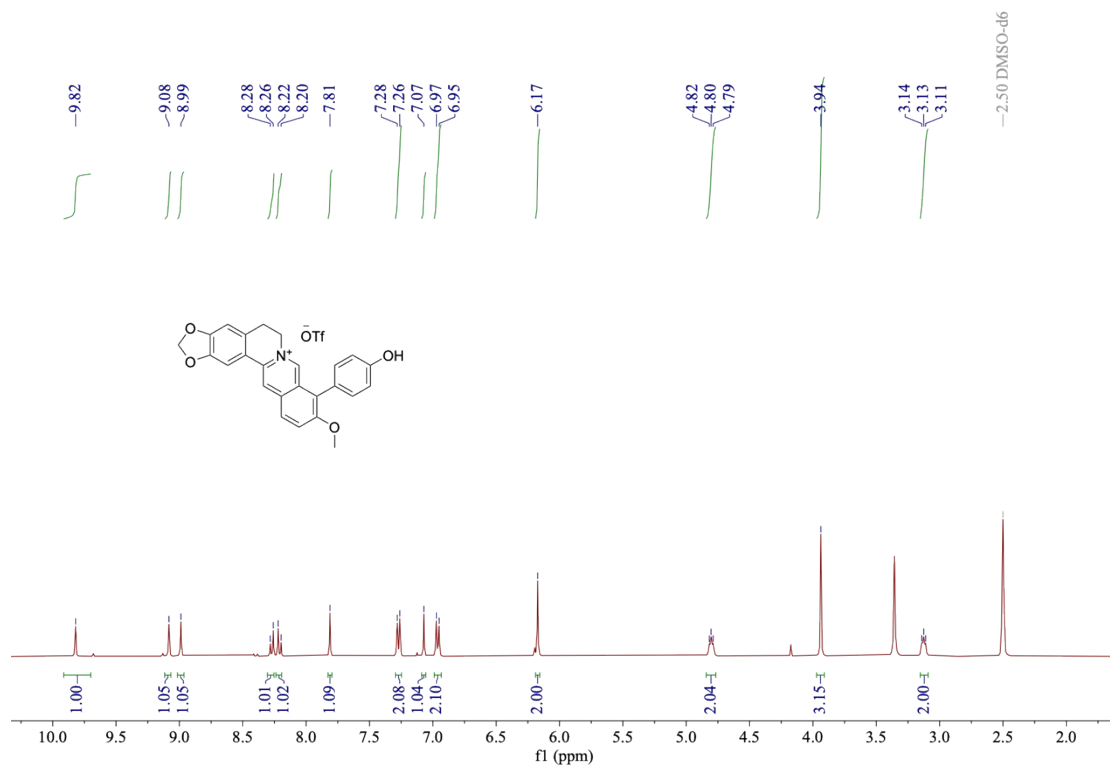

**Figure S20.**  $^1\text{H}$  NMR spectrum of **2e** (400 MHz, DMSO- $d_6$ ).

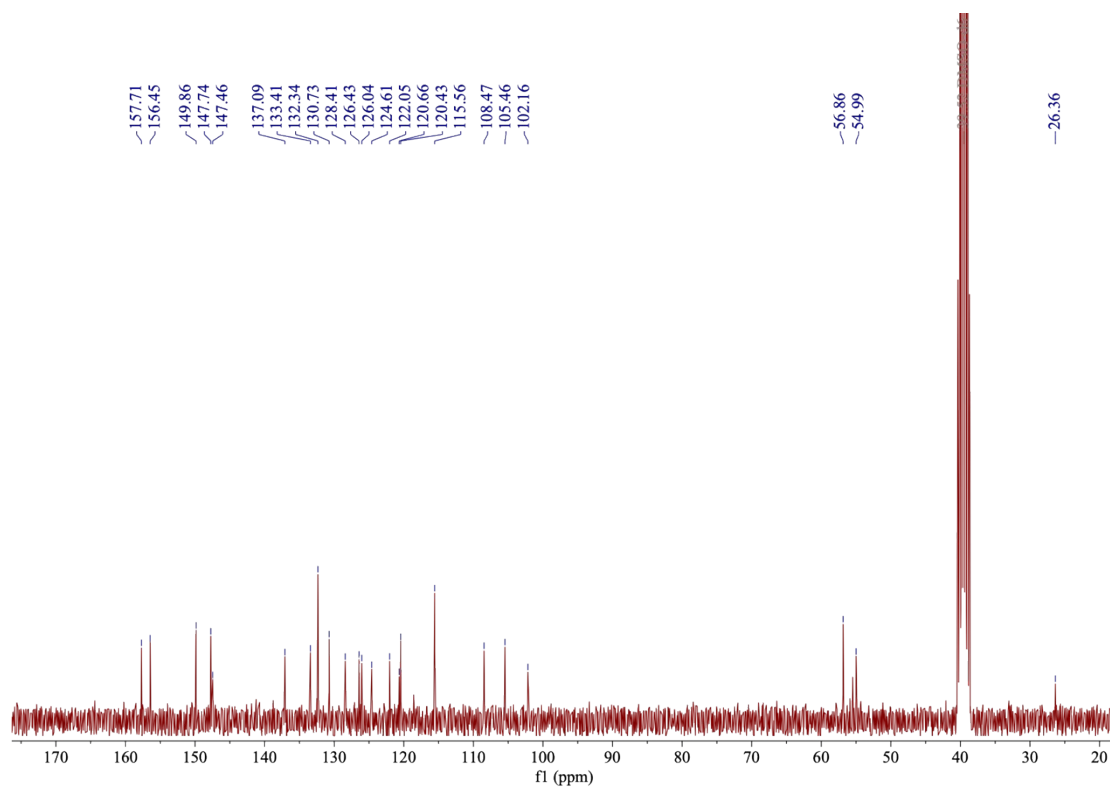

**Figure S21.**  $^{13}\text{C}$  NMR spectrum of **2e** (75 MHz, DMSO- $d_6$ ).

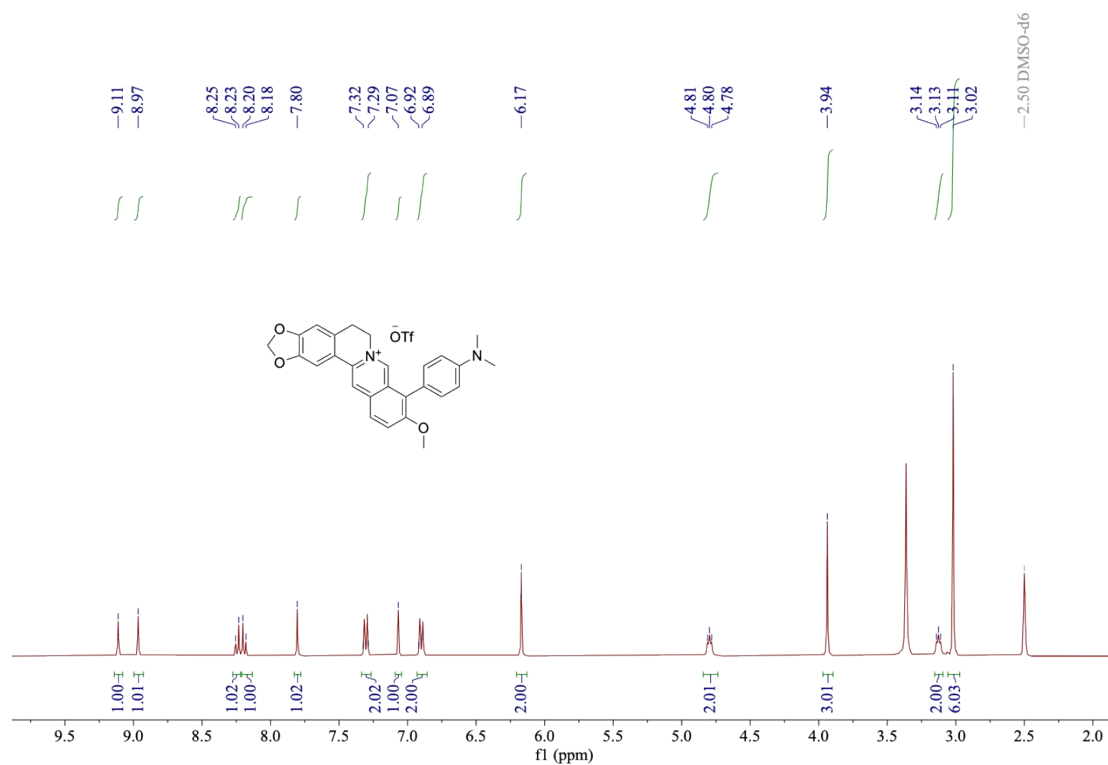

**Figure S22.** <sup>1</sup>H NMR spectrum of **2f** (400 MHz, DMSO-*d*<sub>6</sub>).

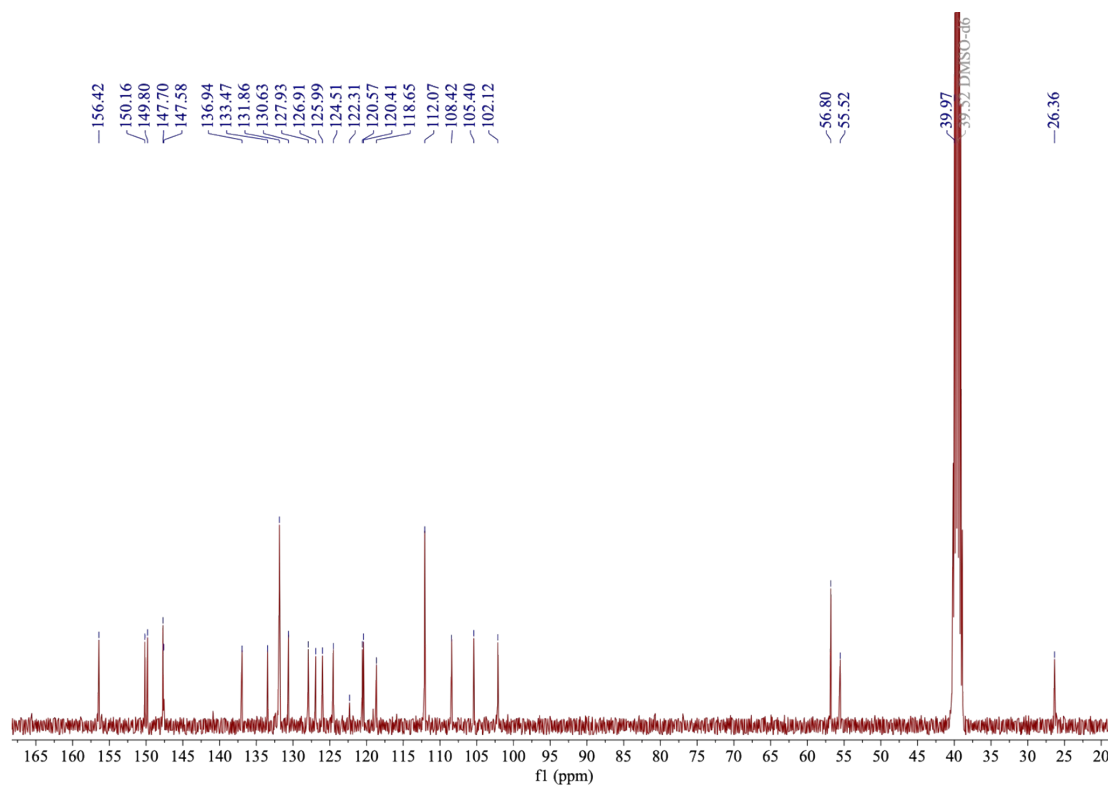

**Figure S23.** <sup>13</sup>C NMR spectrum of **2f** (101 MHz, DMSO-*d*<sub>6</sub>).



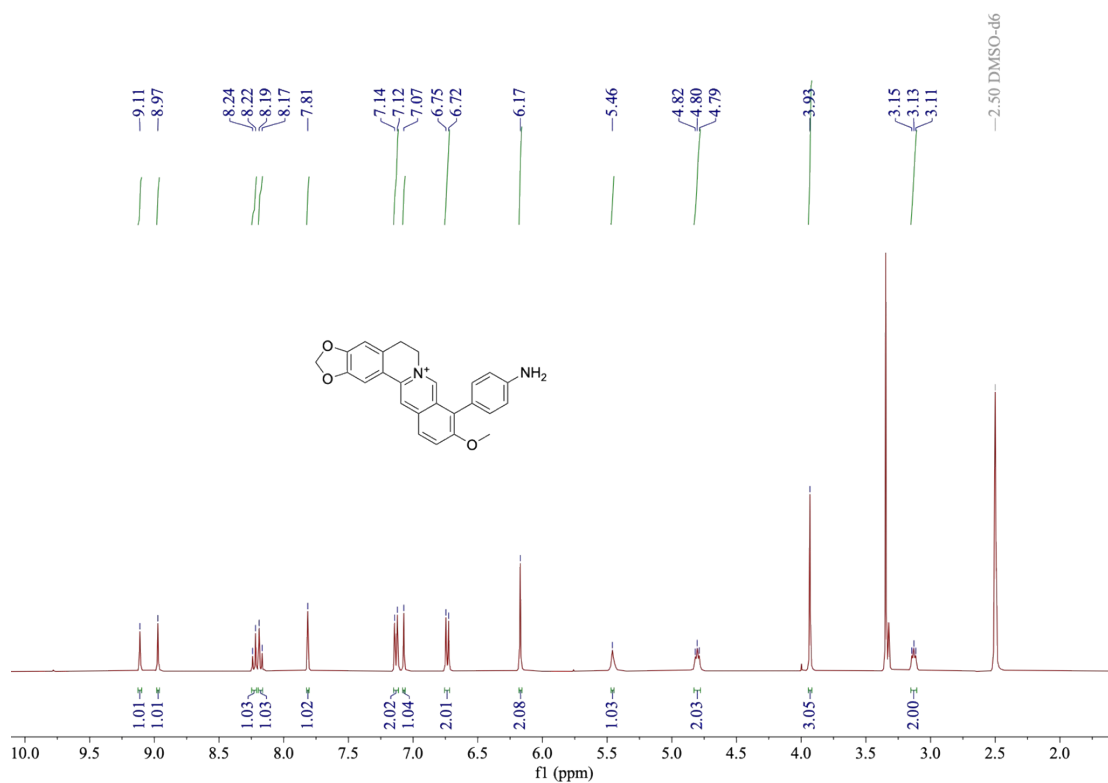

Figure S24.  $^1\text{H}$  NMR spectrum of **2g** (400 MHz,  $\text{DMSO-}d_6$ ).

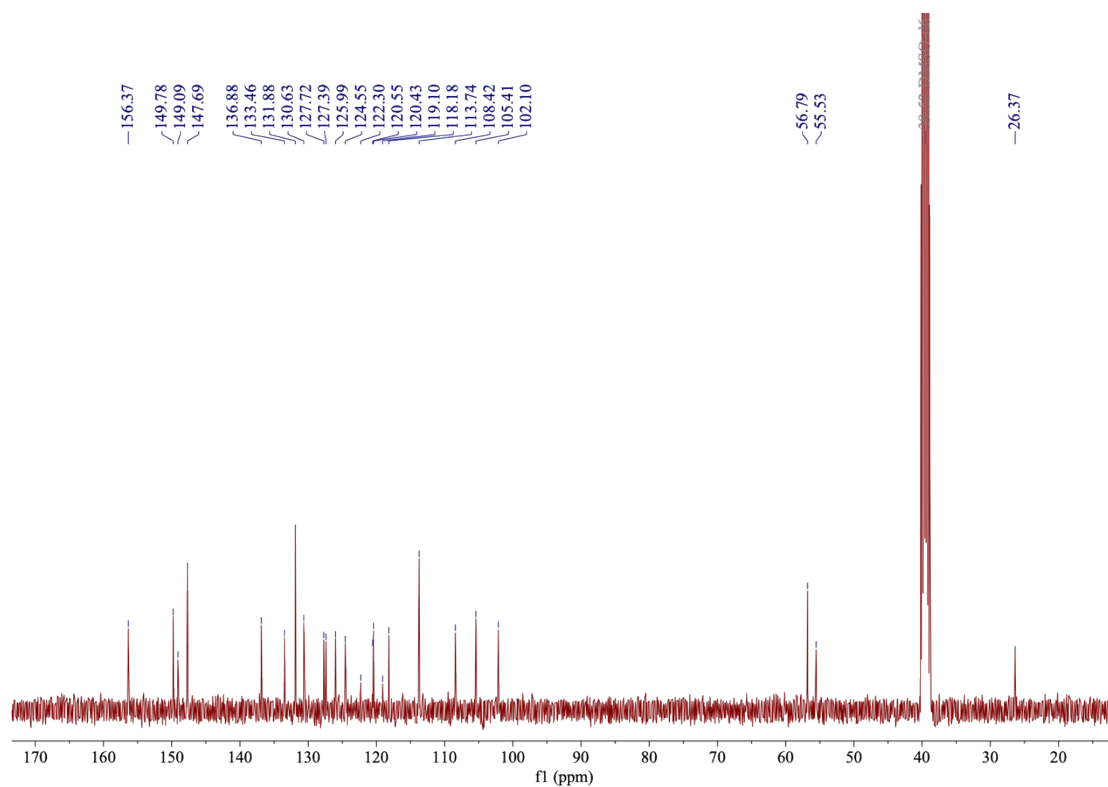

Figure S25.  $^{13}\text{C}$  NMR spectrum of **2g** (101 MHz,  $\text{DMSO-}d_6$ ).

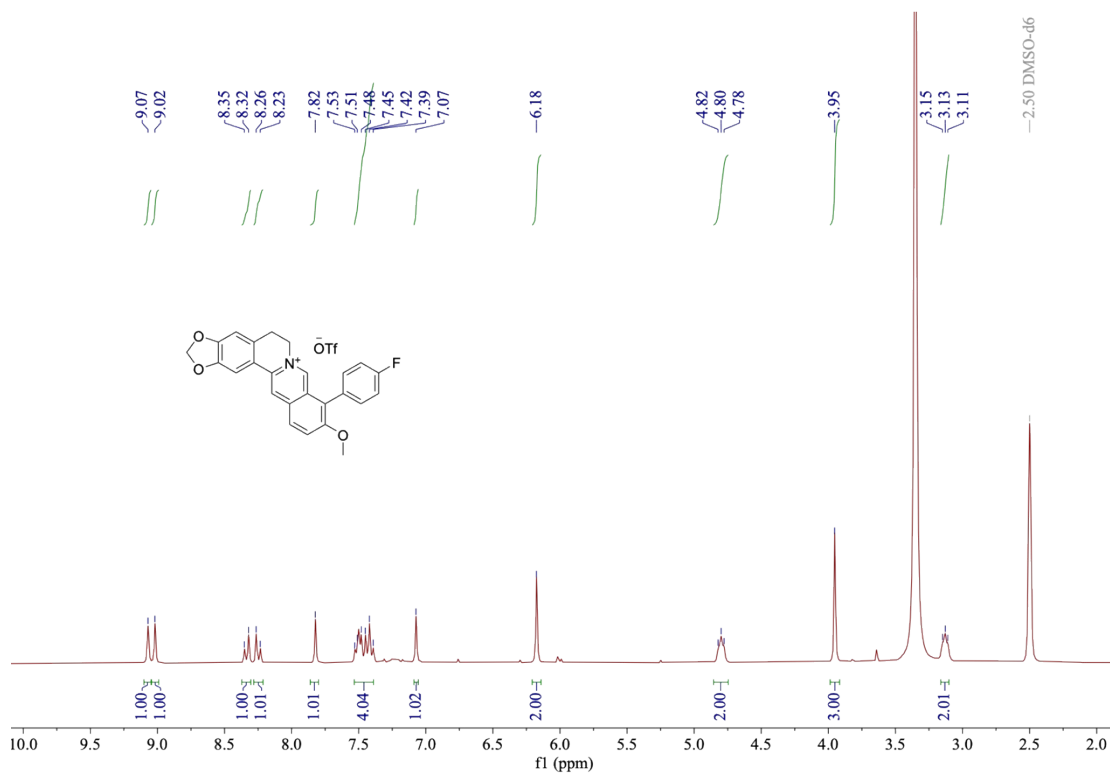

Figure S26. <sup>1</sup>H NMR spectrum of **2h** (300 MHz, DMSO-*d*<sub>6</sub>).

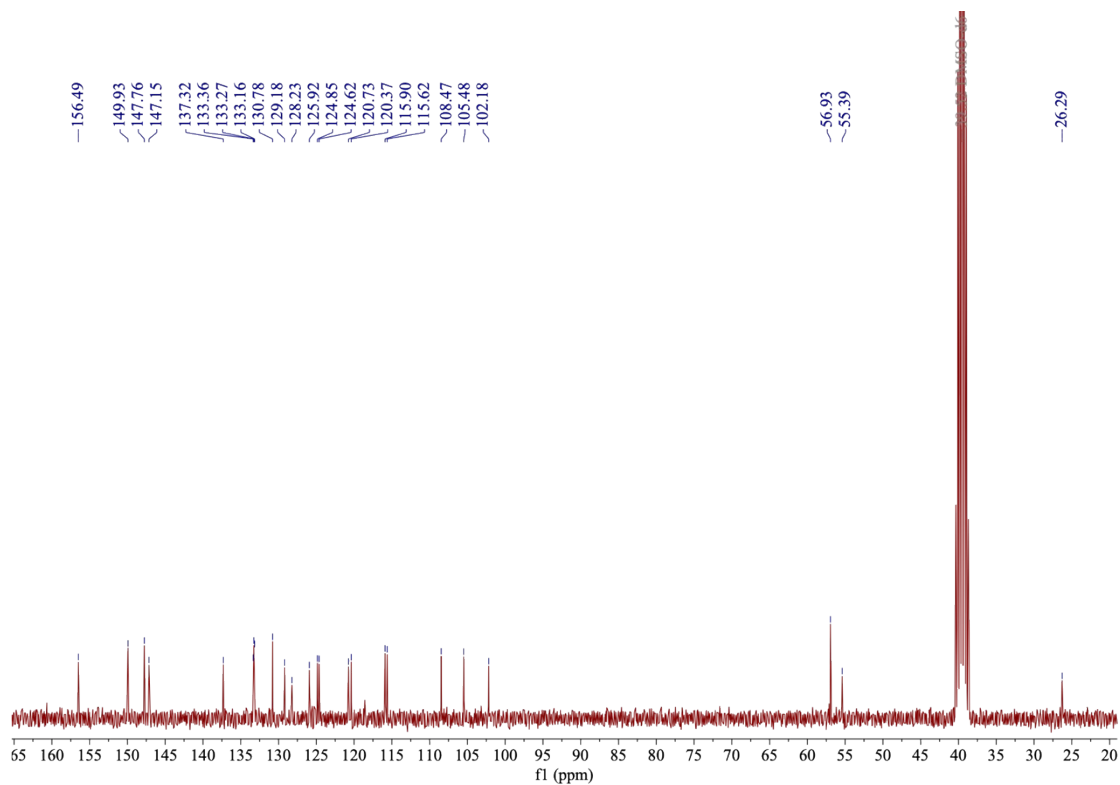

Figure S27. <sup>13</sup>C NMR spectrum of **2h** (75 MHz, DMSO-*d*<sub>6</sub>).

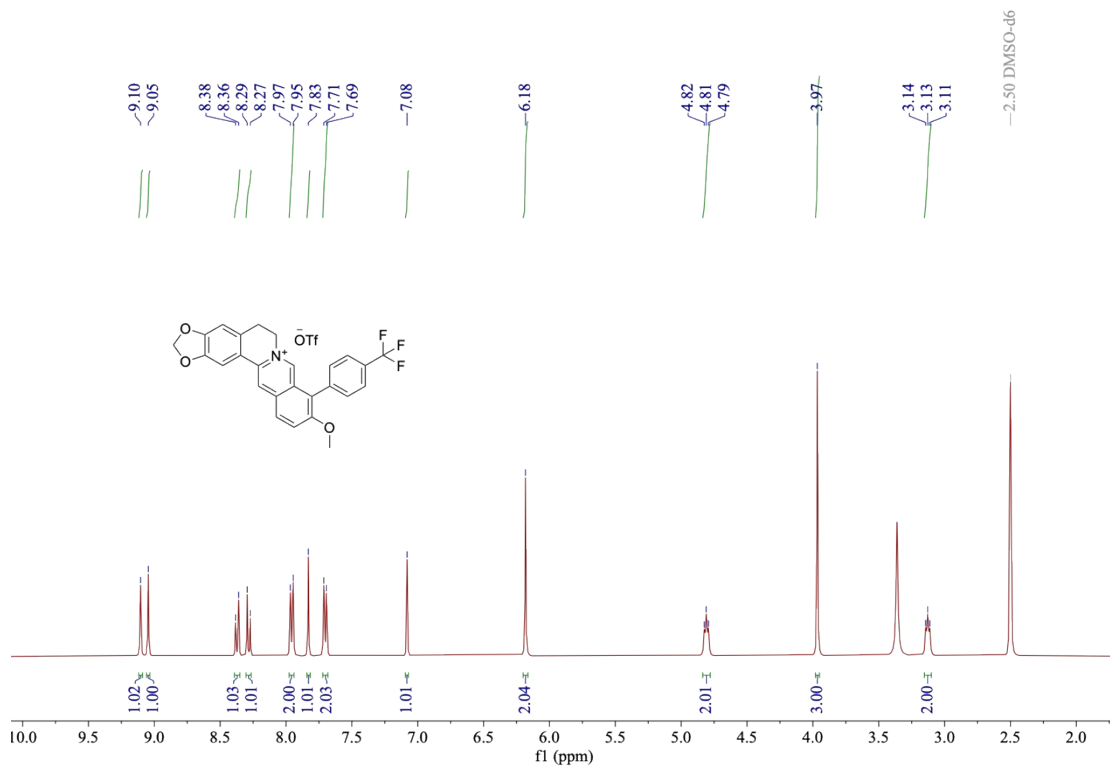

**Figure S28.**  $^1\text{H}$  NMR spectrum of **2i** (400 MHz, DMSO- $d_6$ ).

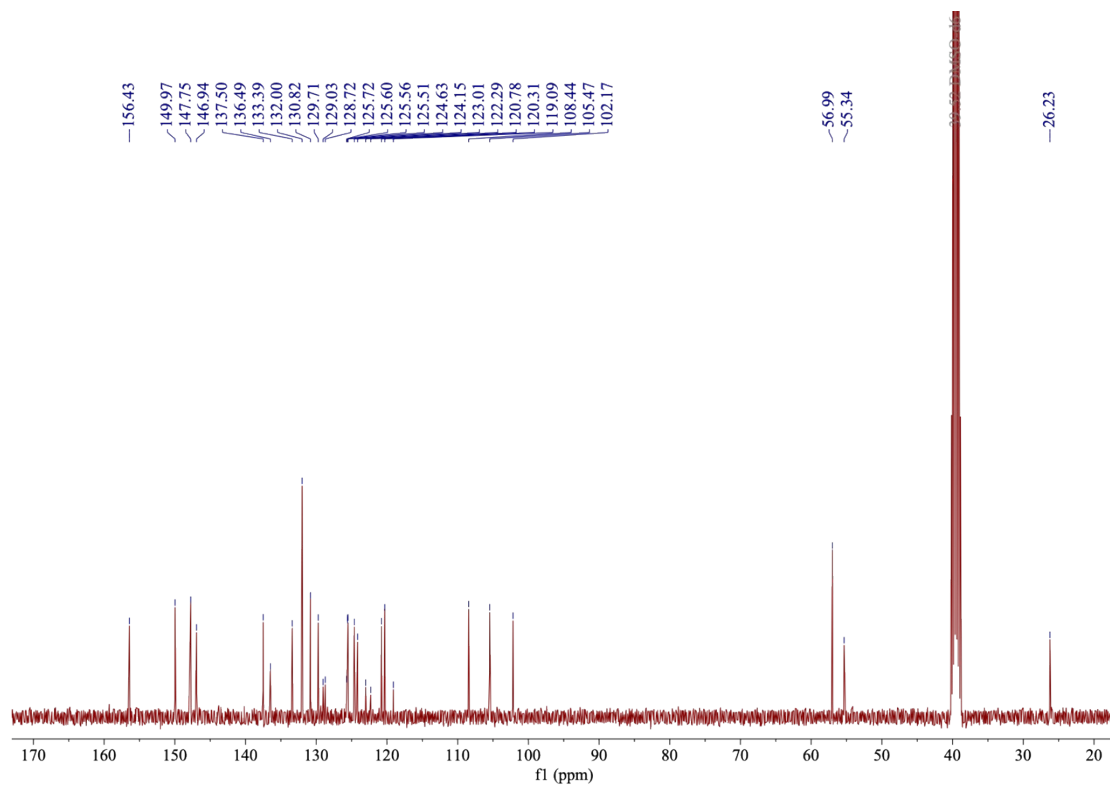

**Figure S29.**  $^{13}\text{C}$  NMR spectrum of **2i** (101 MHz, DMSO- $d_6$ ).

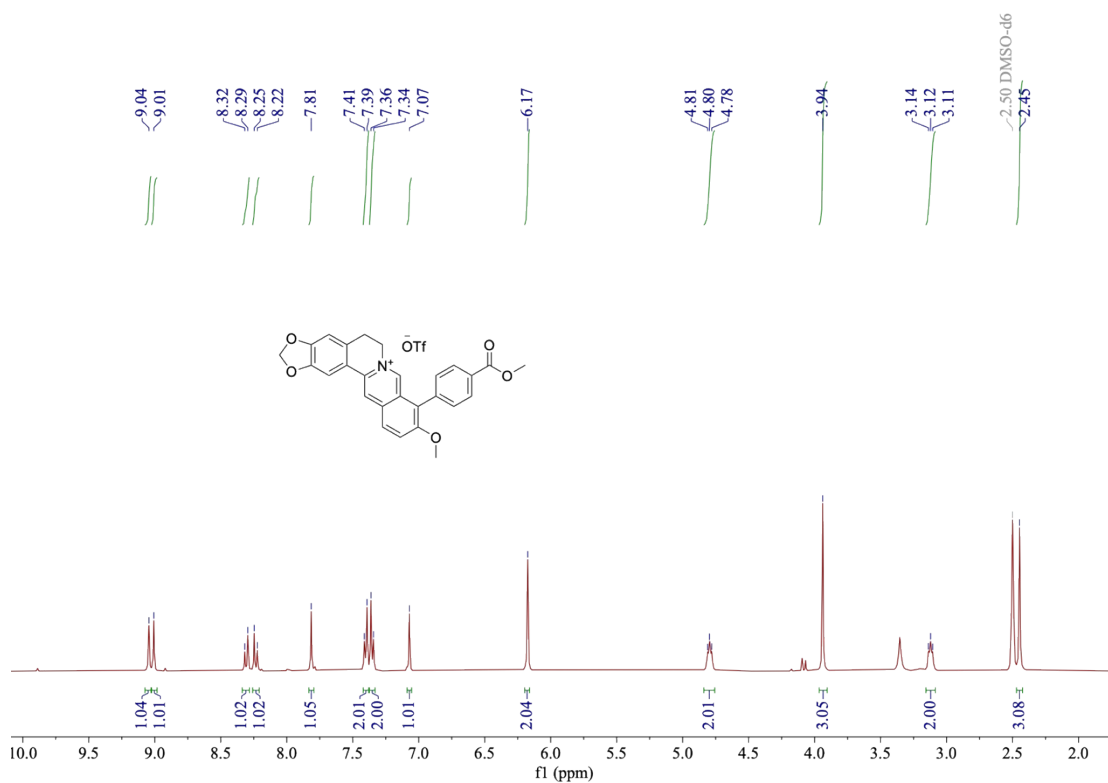

**Figure S30.** <sup>1</sup>H NMR spectrum of **2j** (400 MHz, DMSO-*d*<sub>6</sub>).

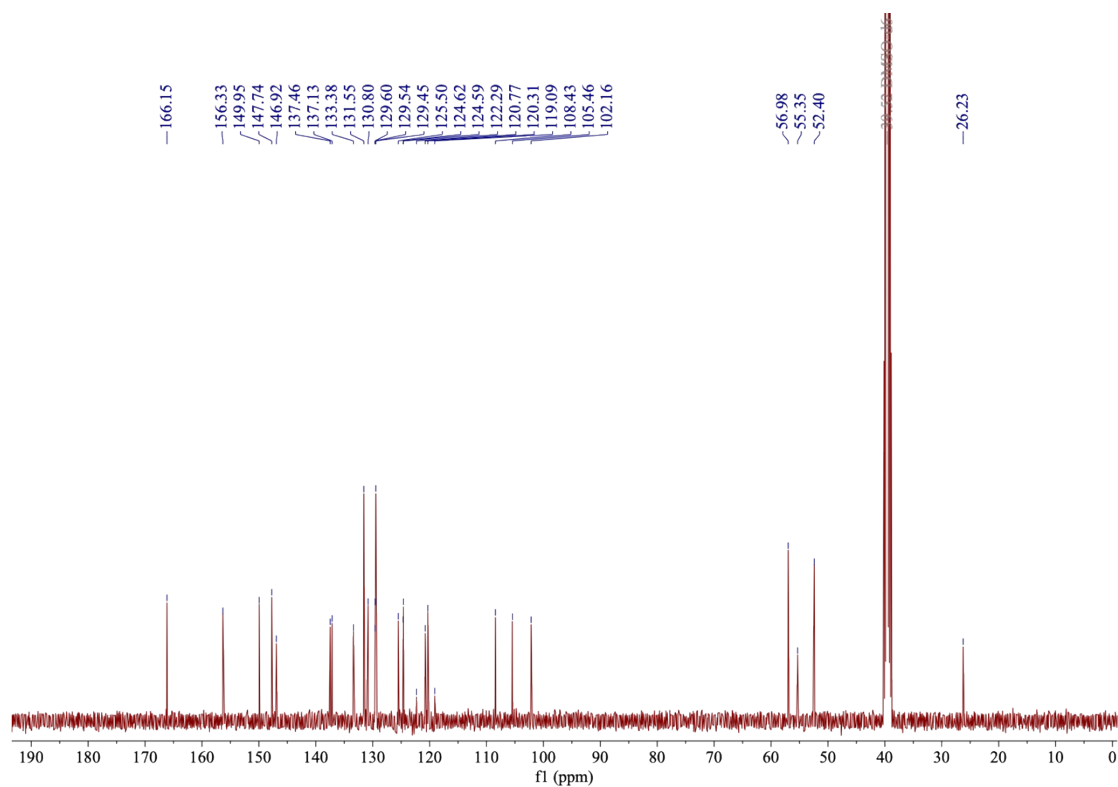

**Figure S31.** <sup>13</sup>C NMR spectrum of **2j** (101 MHz, DMSO-*d*<sub>6</sub>).

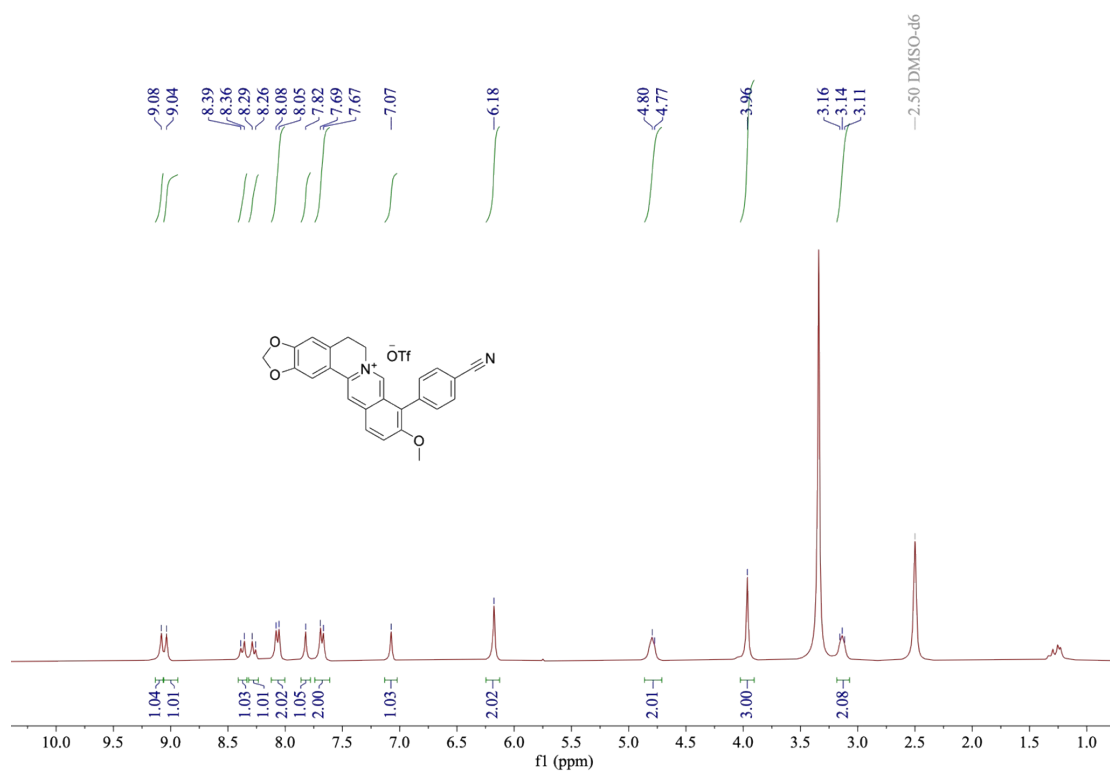

Figure S32. <sup>1</sup>H NMR spectrum of **2k** (300 MHz, DMSO-*d*<sub>6</sub>).

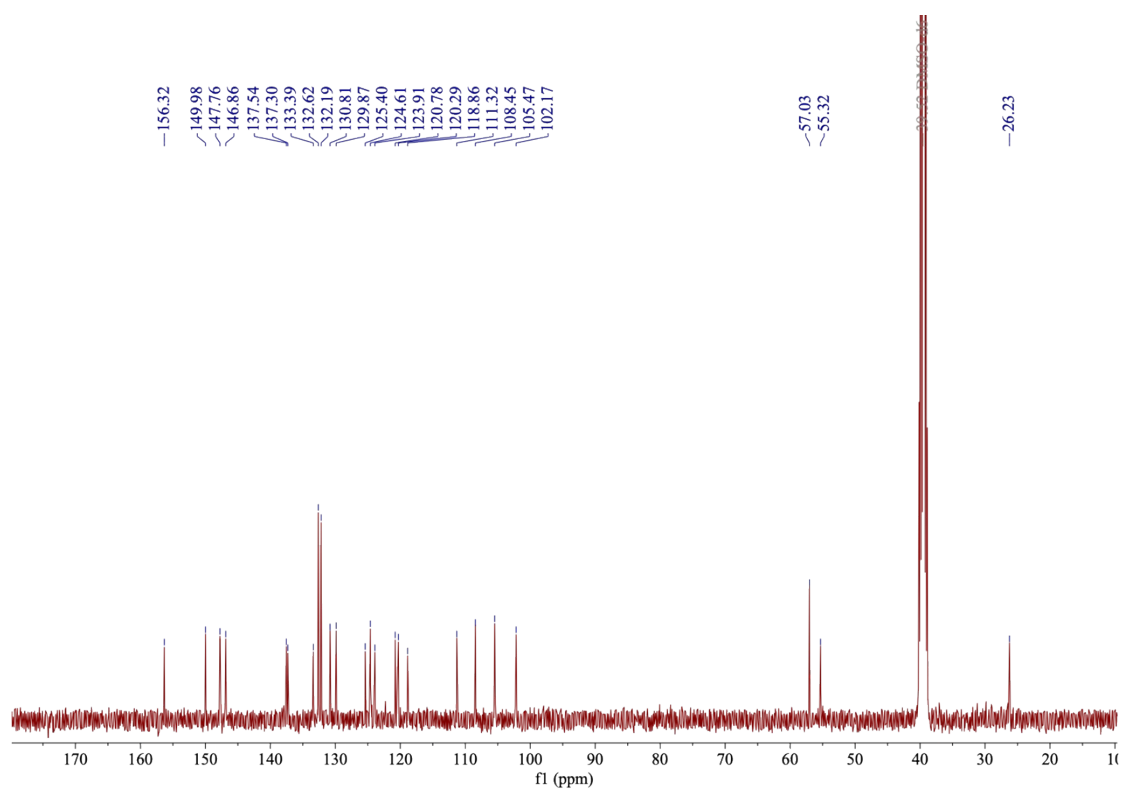

Figure S33. <sup>13</sup>C NMR spectrum of **2k** (101 MHz, DMSO-*d*<sub>6</sub>).

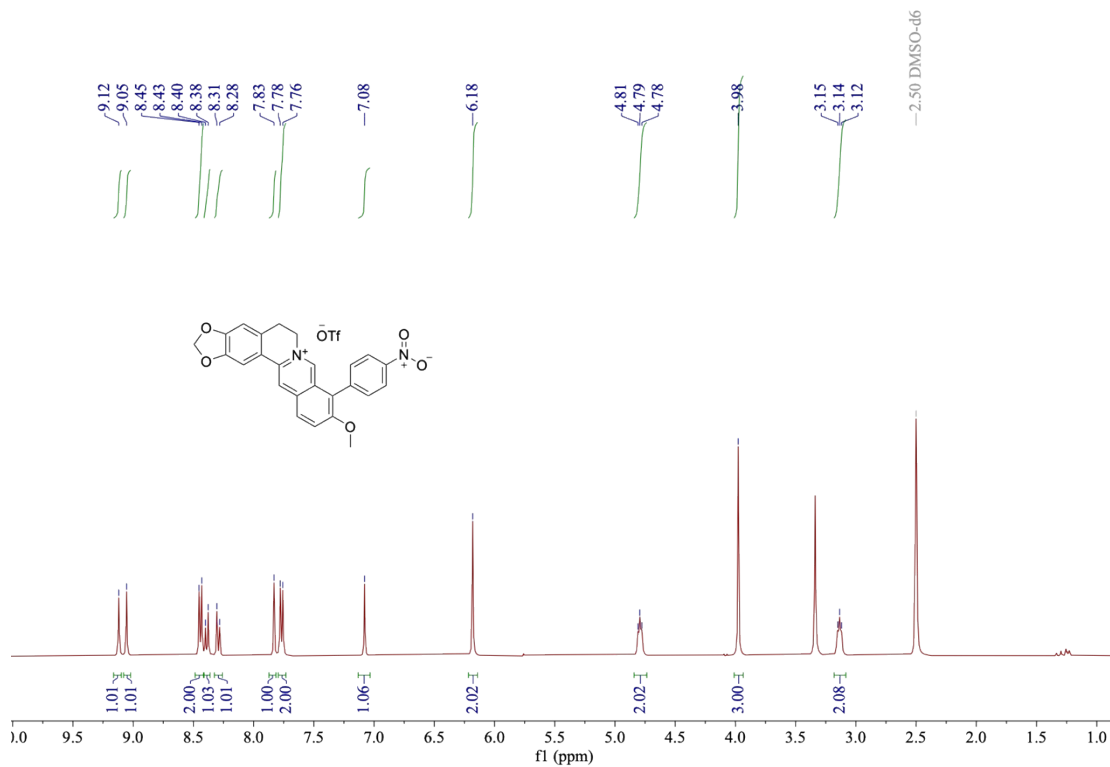

**Figure S34.** <sup>1</sup>H NMR spectrum of **2I** (400 MHz, DMSO-*d*<sub>6</sub>).

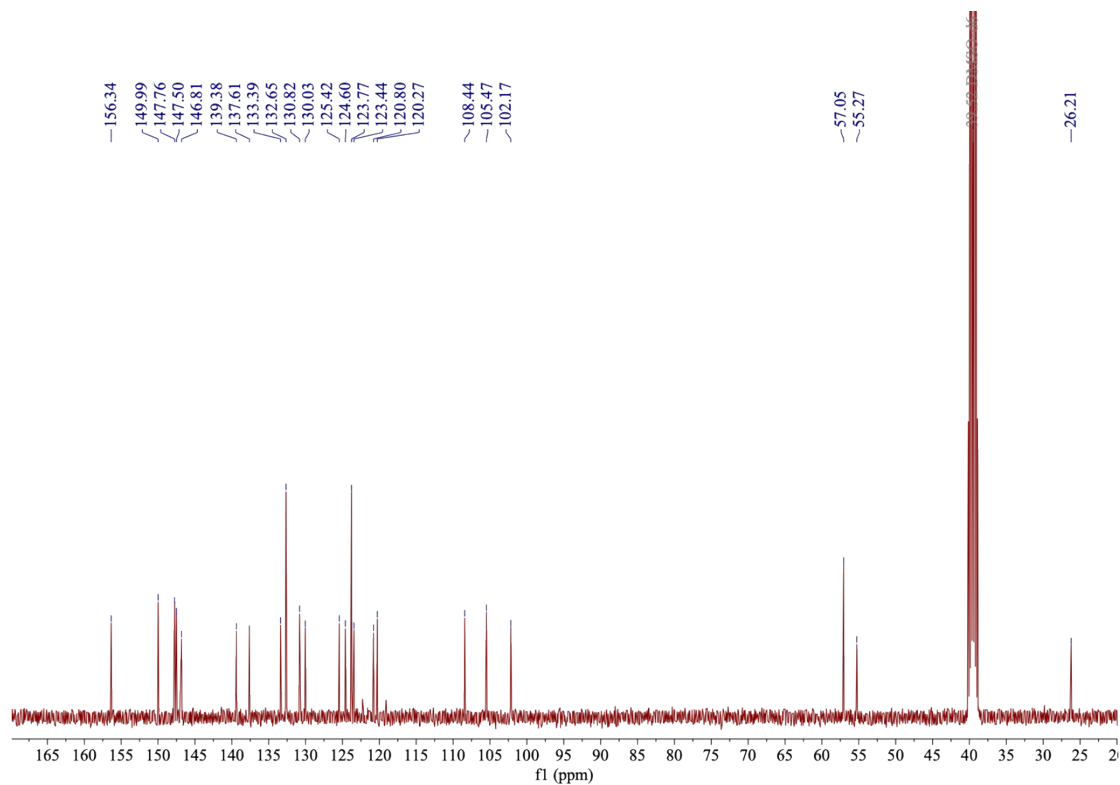

**Figure S35.** <sup>13</sup>C NMR spectrum of **2I** (101 MHz, DMSO-*d*<sub>6</sub>).

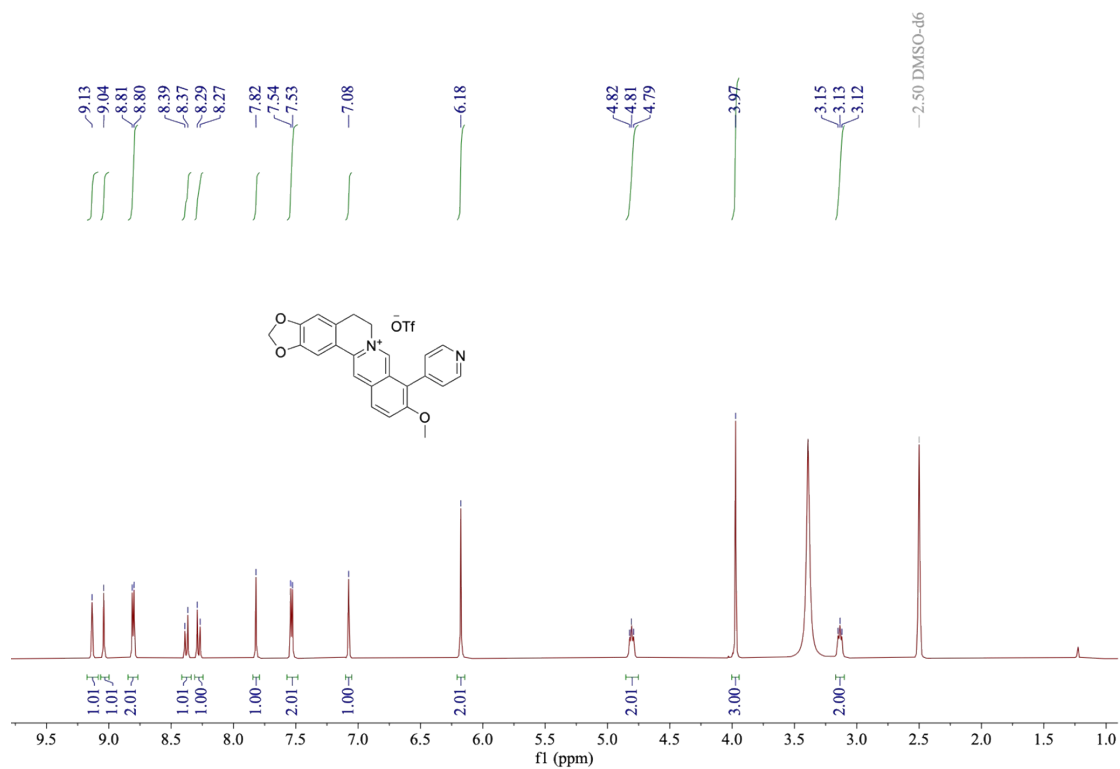

Figure S36. <sup>1</sup>H NMR spectrum of **2m** (400 MHz, DMSO-*d*<sub>6</sub>).

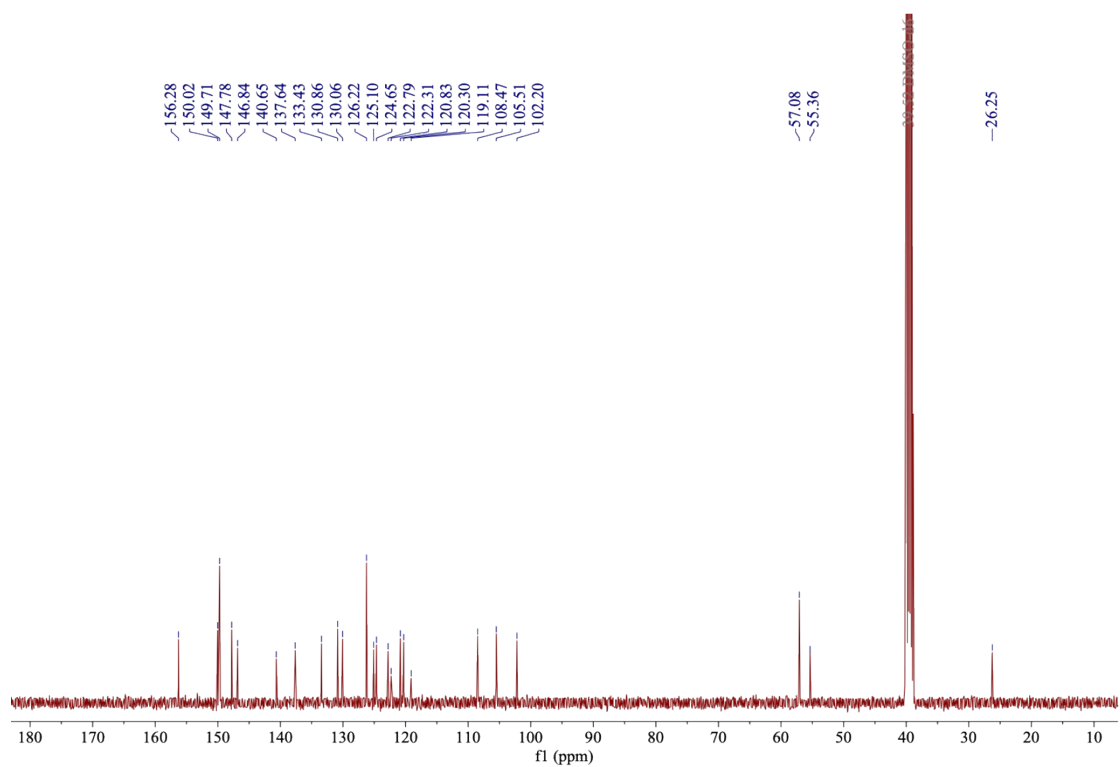

Figure S37. <sup>13</sup>C NMR spectrum of **2m** (101 MHz, DMSO-*d*<sub>6</sub>).

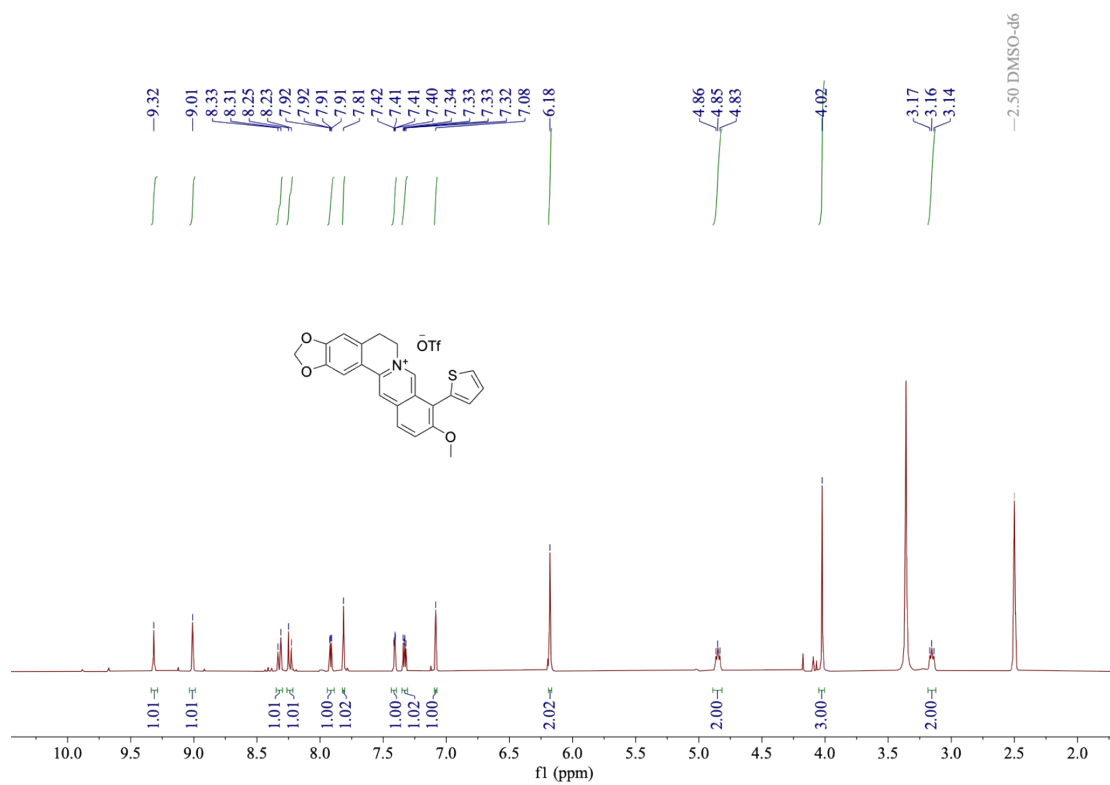

**Figure S38.**  $^1\text{H}$  NMR spectrum of **2n** (400 MHz,  $\text{DMSO-}d_6$ ).

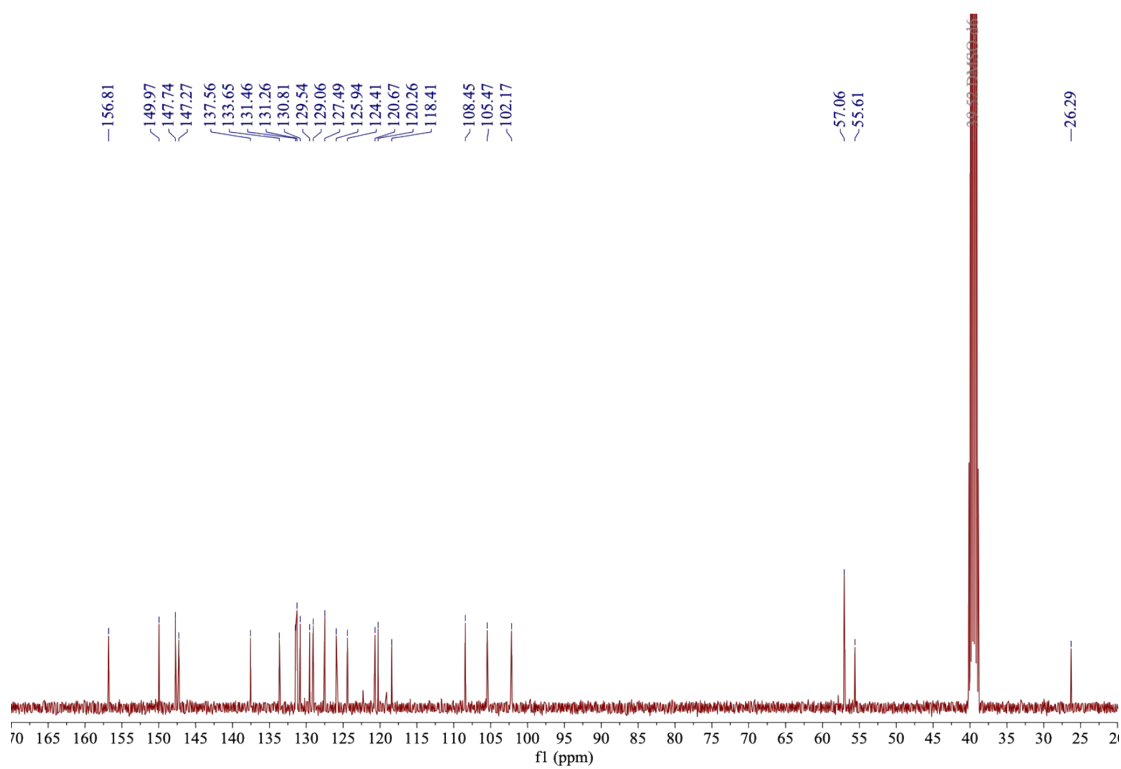

**Figure S39.**  $^{13}\text{C}$  NMR spectrum of **2n** (101 MHz,  $\text{DMSO-}d_6$ ).



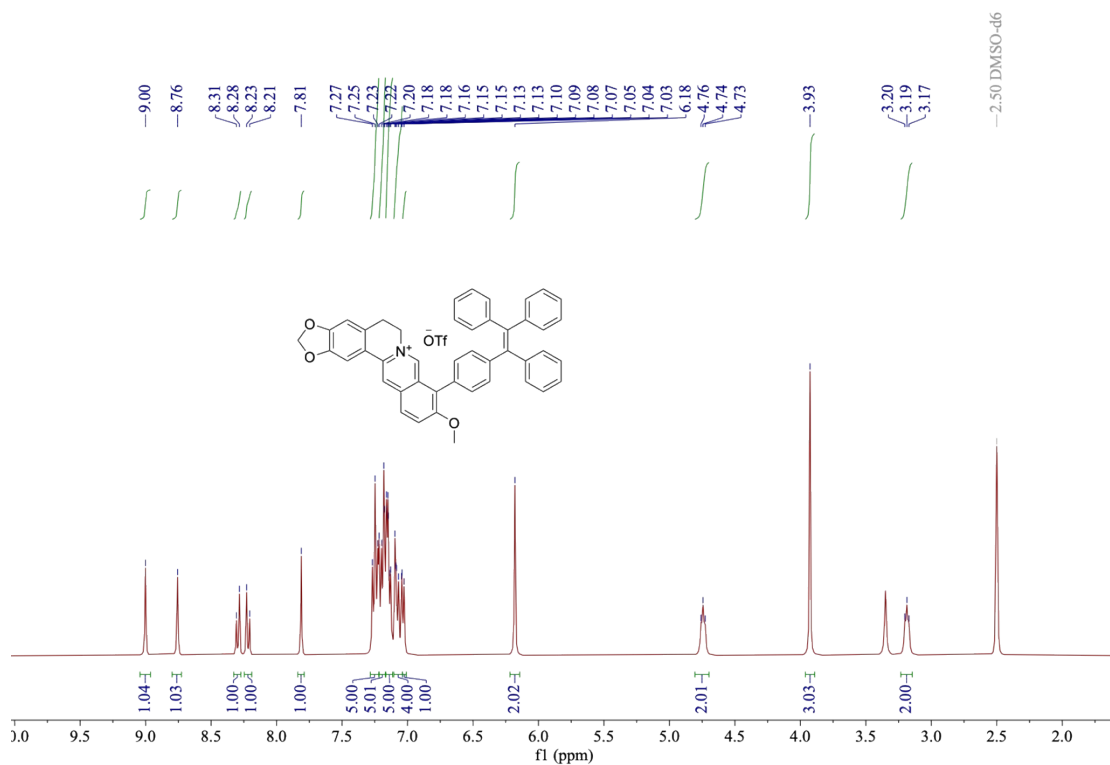

Figure S40. <sup>1</sup>H NMR spectrum of **2o** (400 MHz, DMSO-*d*<sub>6</sub>).

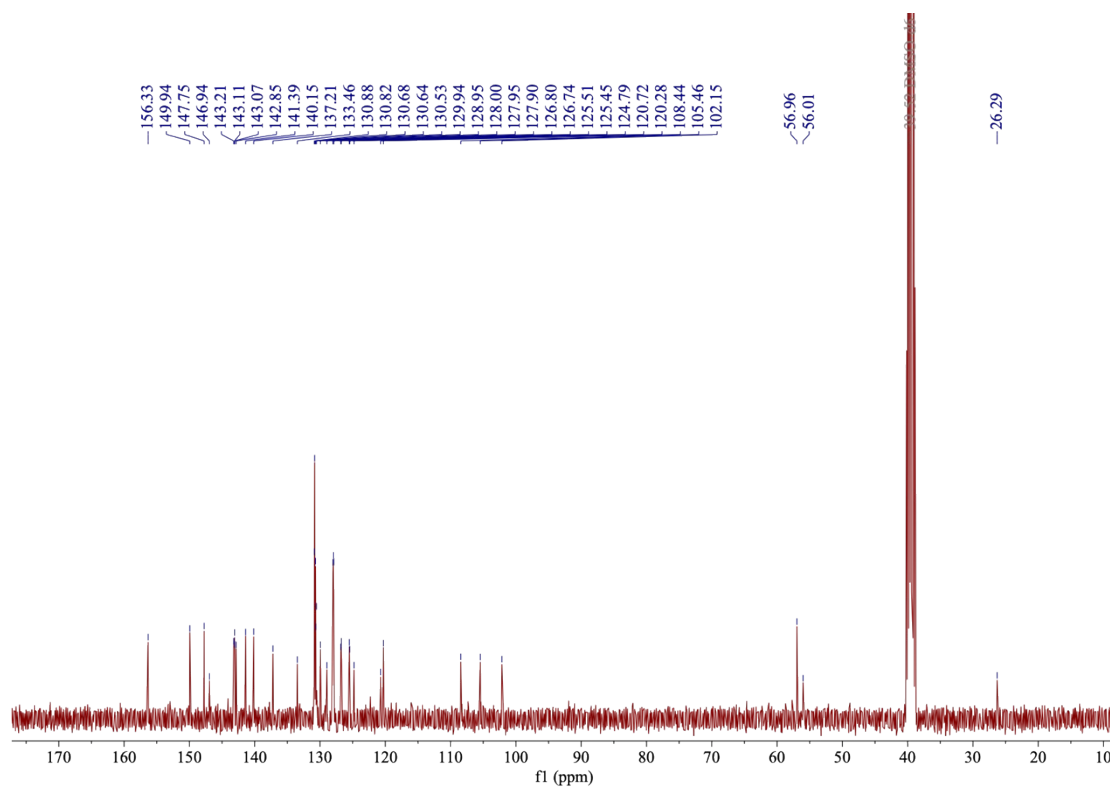

Figure S41. <sup>13</sup>C NMR spectrum of **2o** (101 MHz, DMSO-*d*<sub>6</sub>).

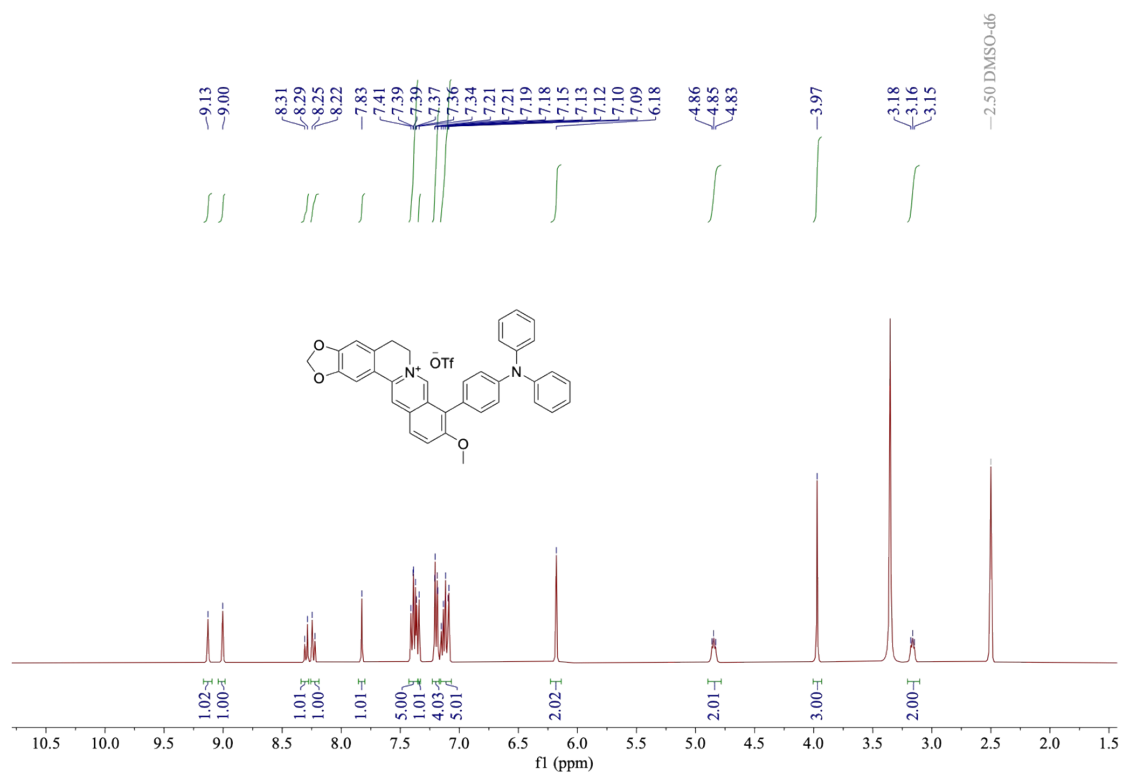

Figure S42. <sup>1</sup>H NMR spectrum of **2p** (400 MHz, DMSO-*d*<sub>6</sub>).

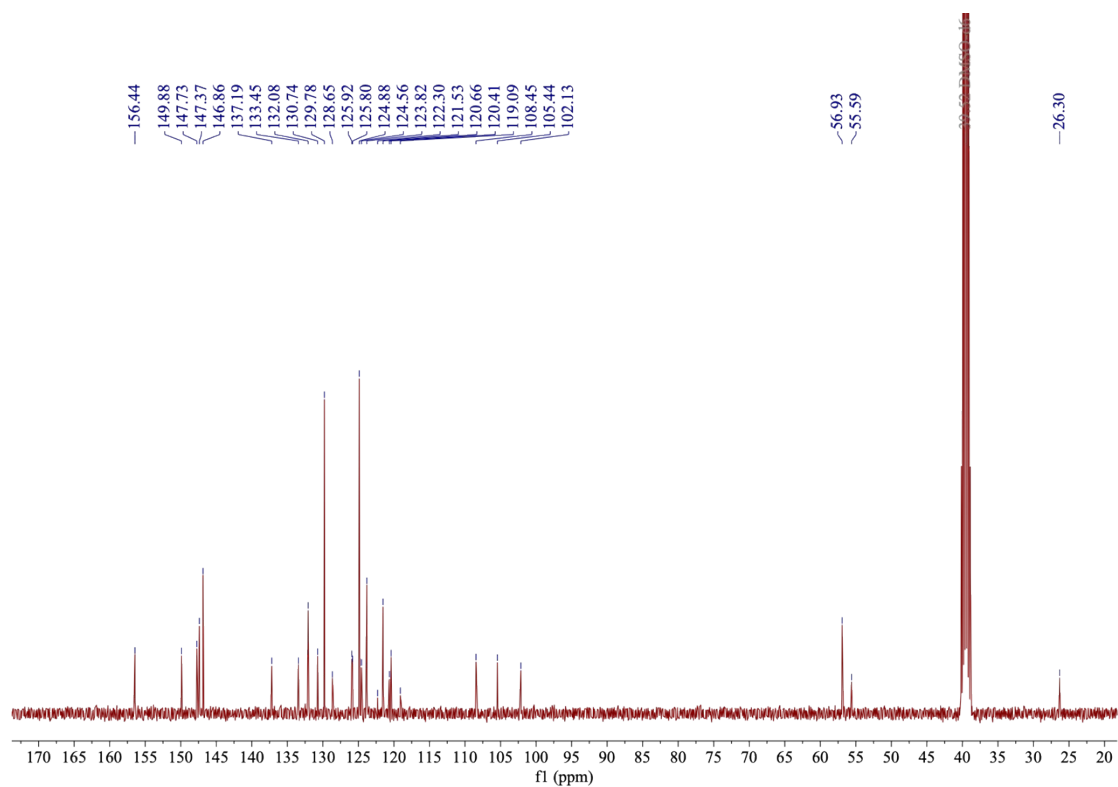

Figure S43. <sup>13</sup>C NMR spectrum of **2p** (101 MHz, DMSO-*d*<sub>6</sub>).

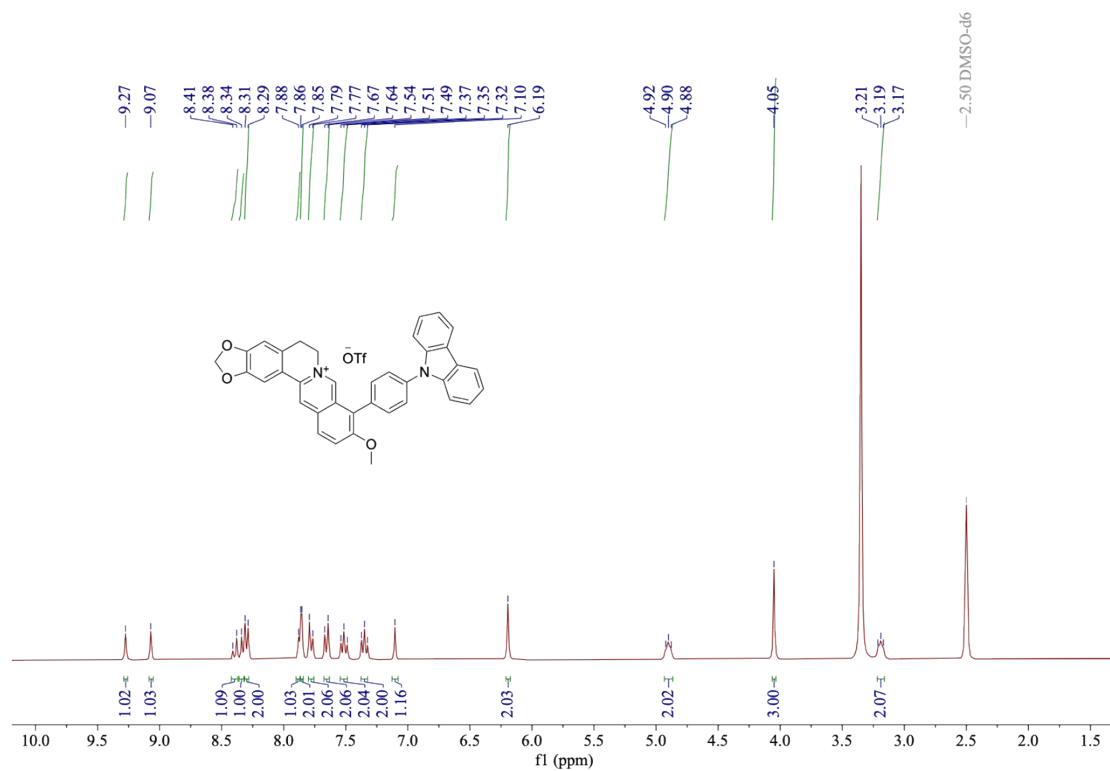

Figure S44. <sup>1</sup>H NMR spectrum of **2q** (300 MHz, DMSO-*d*<sub>6</sub>).

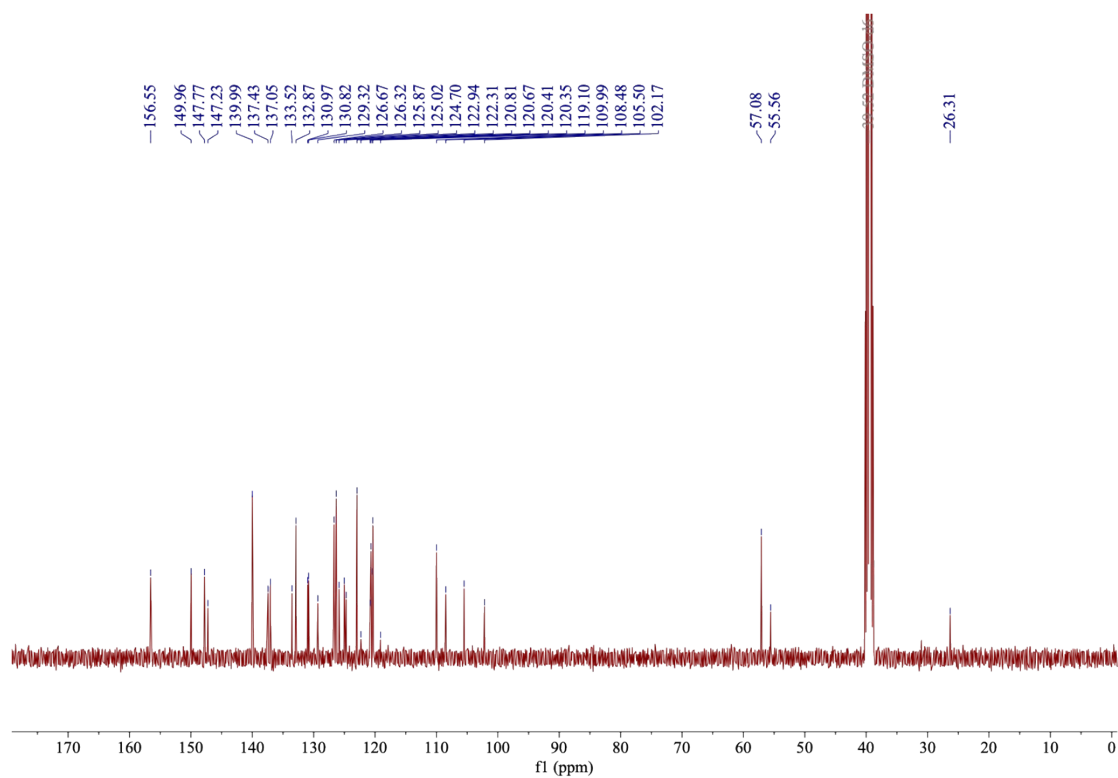

Figure S45. <sup>13</sup>C NMR spectrum of **2q** (101 MHz, DMSO-*d*<sub>6</sub>).

## 5. HRMS Spectra of all the compounds

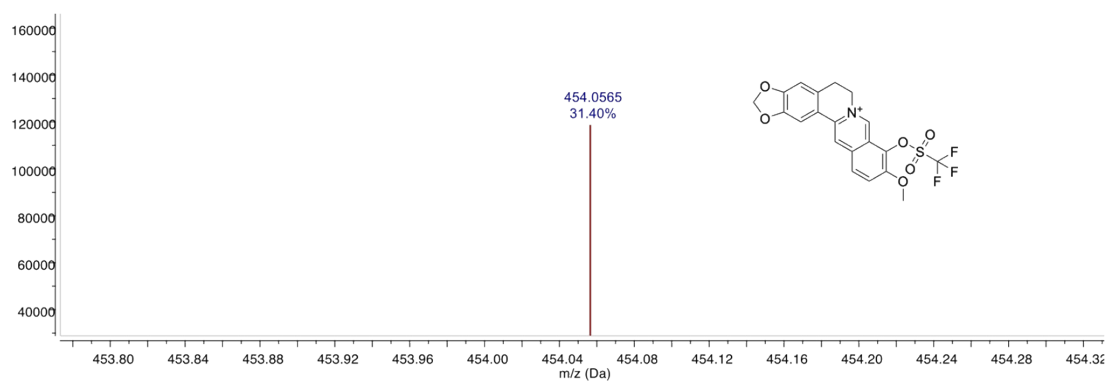

Figure S46. HRMS spectrum of *compound 1*.

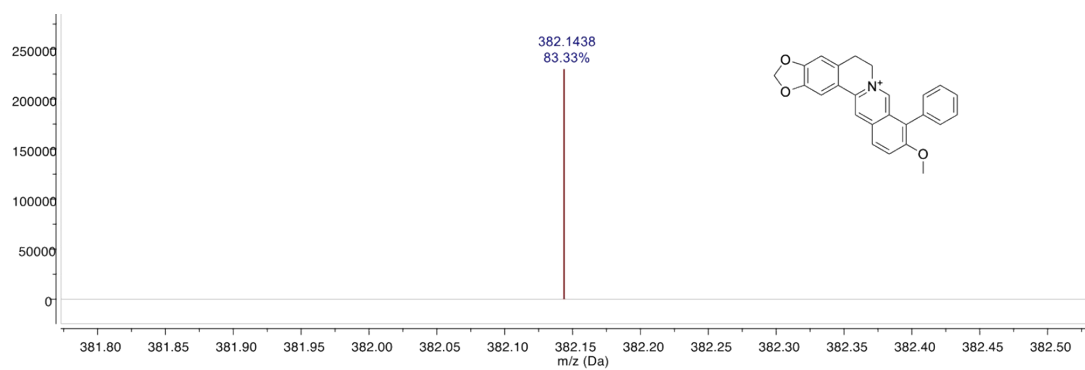

Figure S47. HRMS spectrum of *2a*.

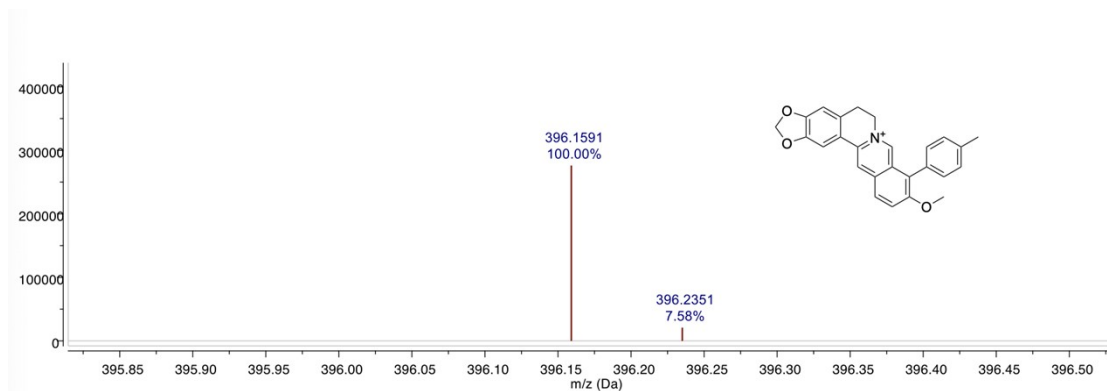

Figure S48. HRMS spectrum of *2b*.

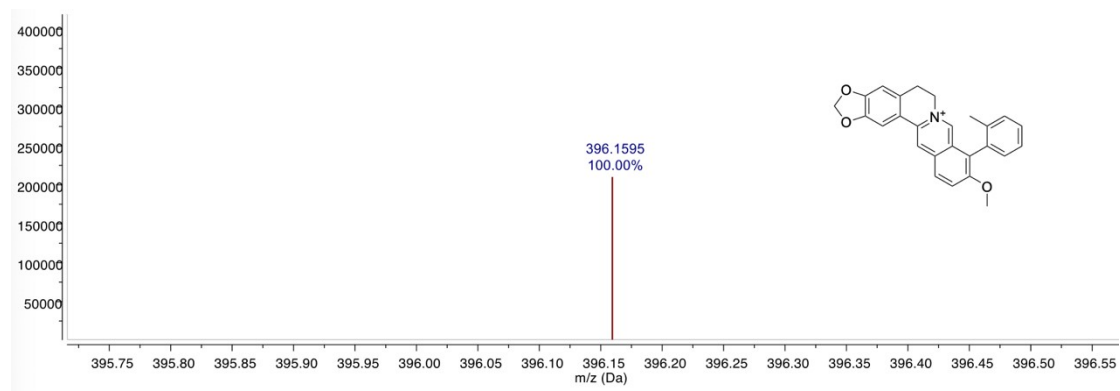

**Figure S49.** HRMS spectrum of **2c**.

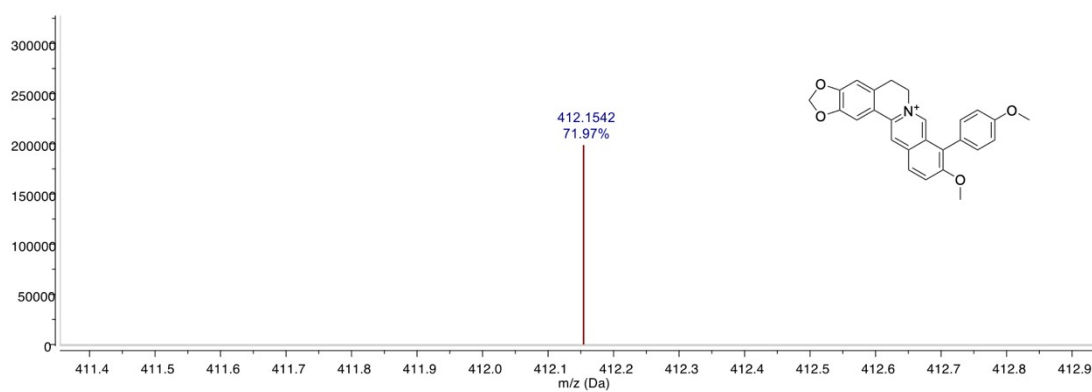

**Figure S50.** HRMS spectrum of **2d**.

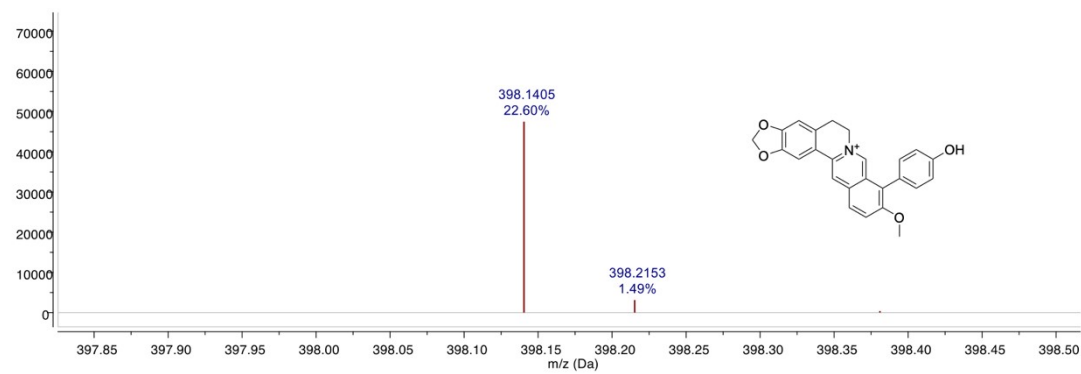

**Figure S51.** HRMS spectrum of **2e**.

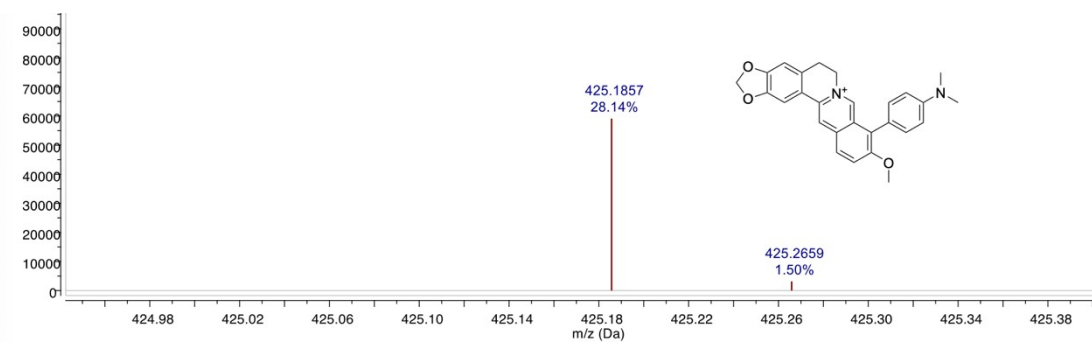

**Figure S52.** HRMS spectrum of **2f**.

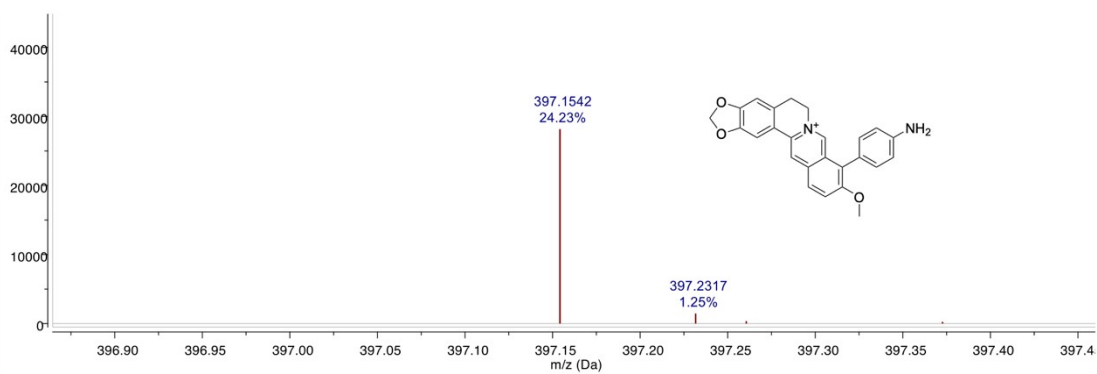

**Figure S53.** HRMS spectrum of **2g**.

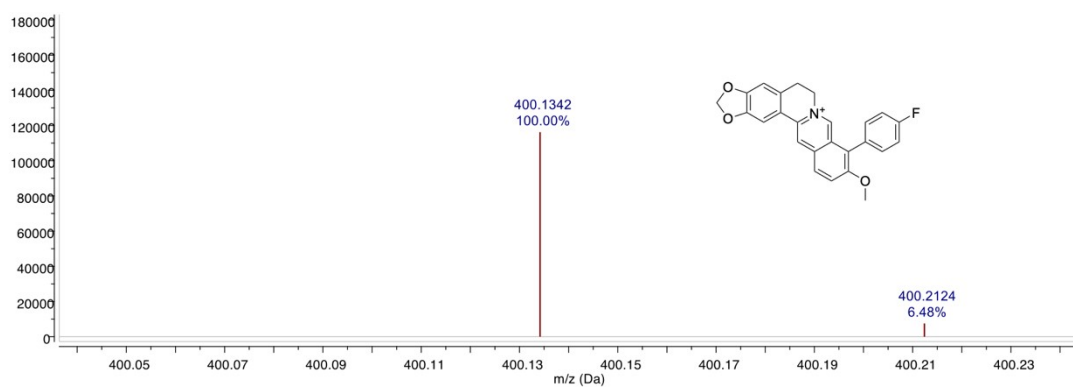

**Figure S54.** HRMS spectrum of **2h**.

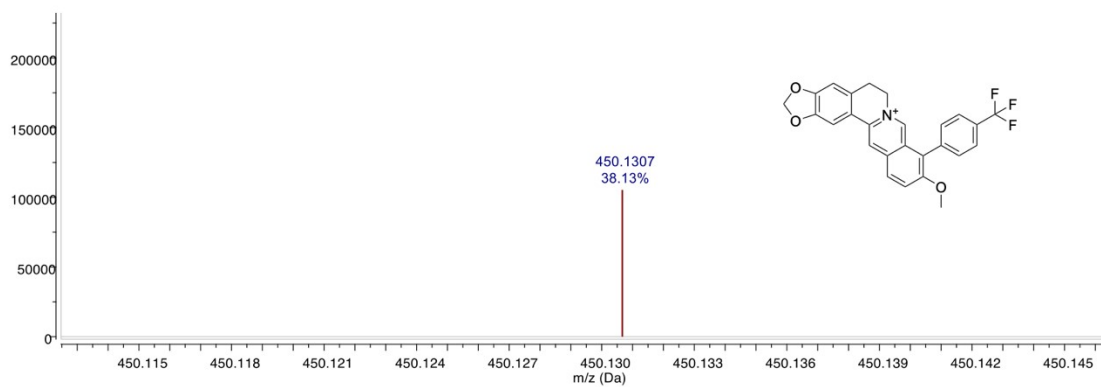

**Figure S55.** HRMS spectrum of **2i**.

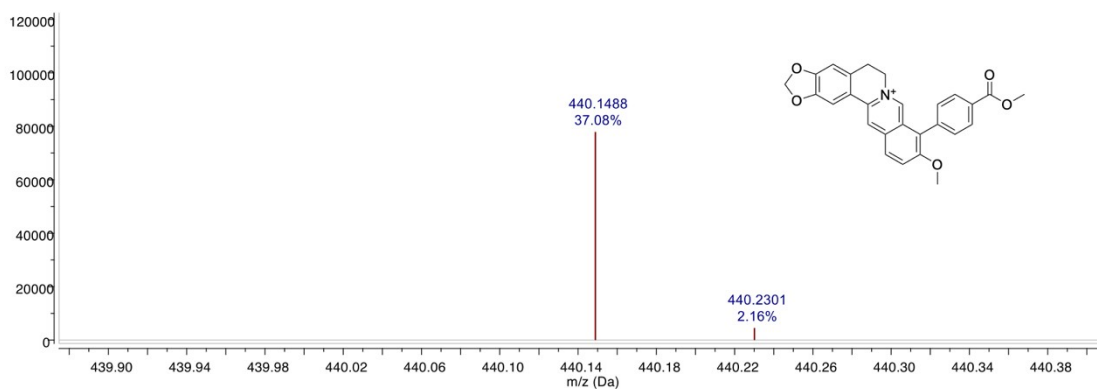

**Figure S56.** HRMS spectrum of **2j**.

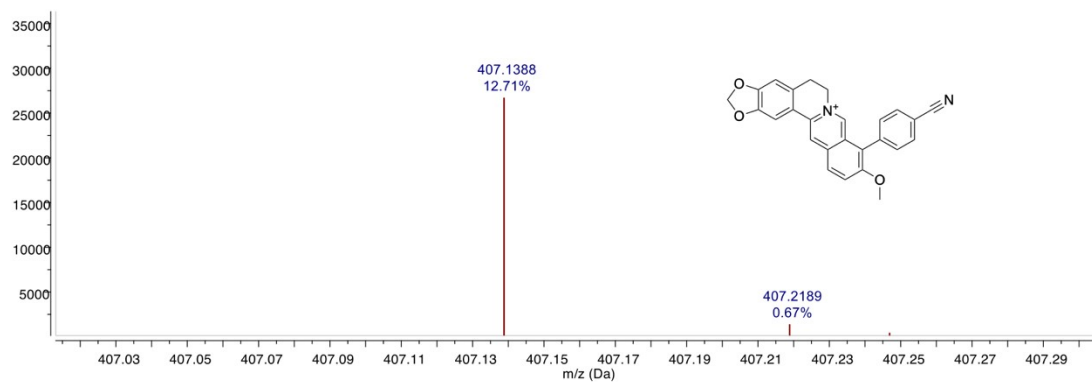

**Figure S57.** HRMS spectrum of **2k**.

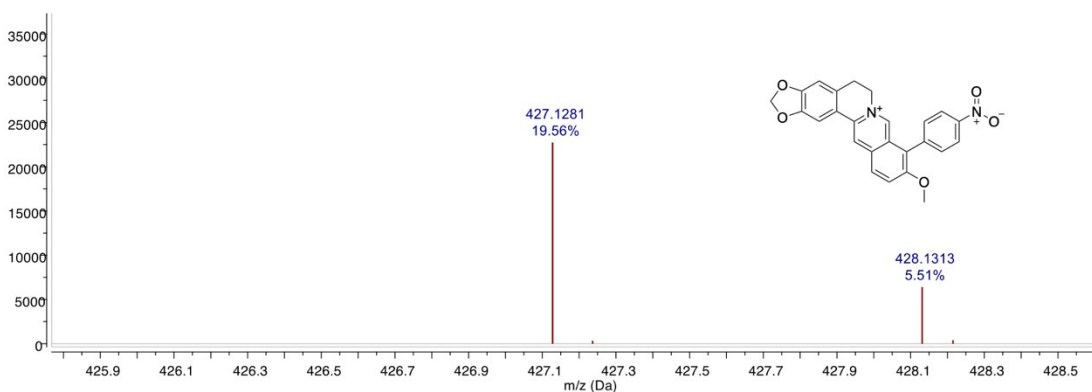

**Figure S58.** HRMS spectrum of **2l**.

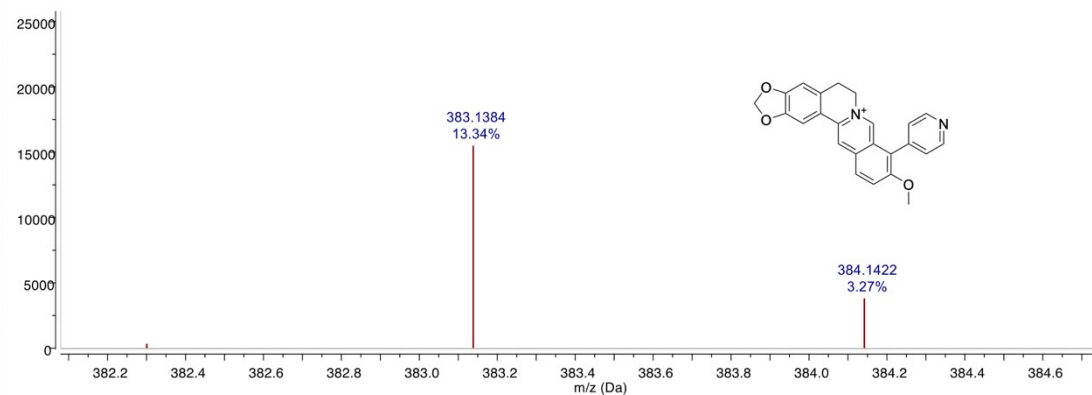

**Figure S59.** HRMS spectrum of **2m**.

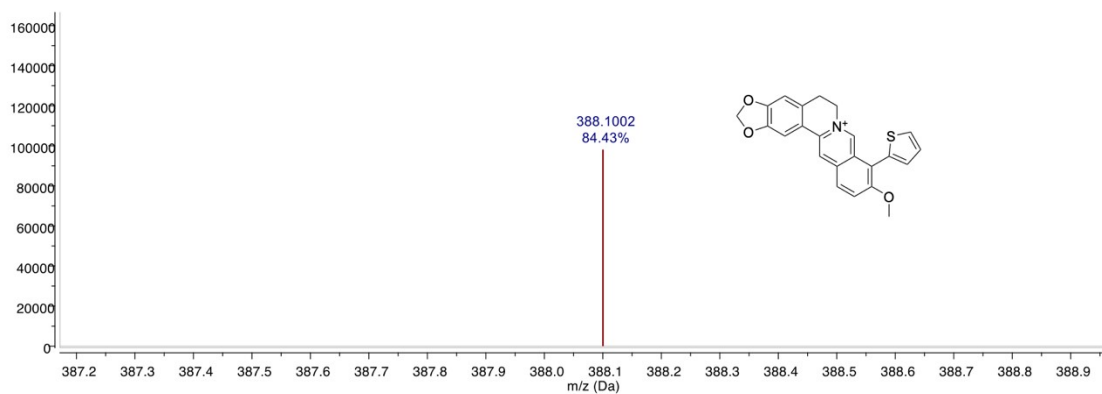

**Figure S60.** HRMS spectrum of **2n**.

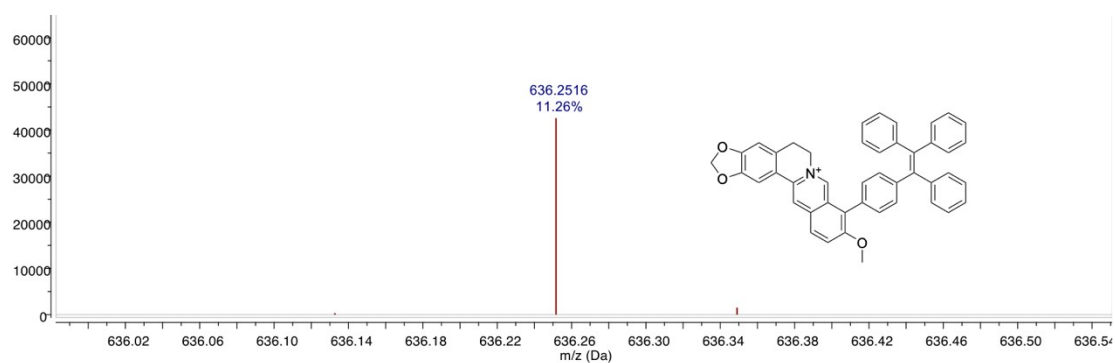

**Figure S61.** HRMS spectrum of **2o**.

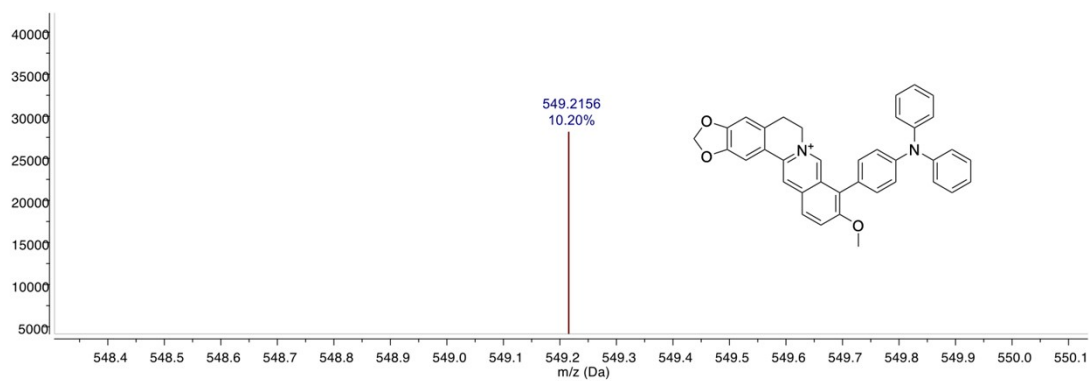

**Figure S62.** HRMS spectrum of **2p**.

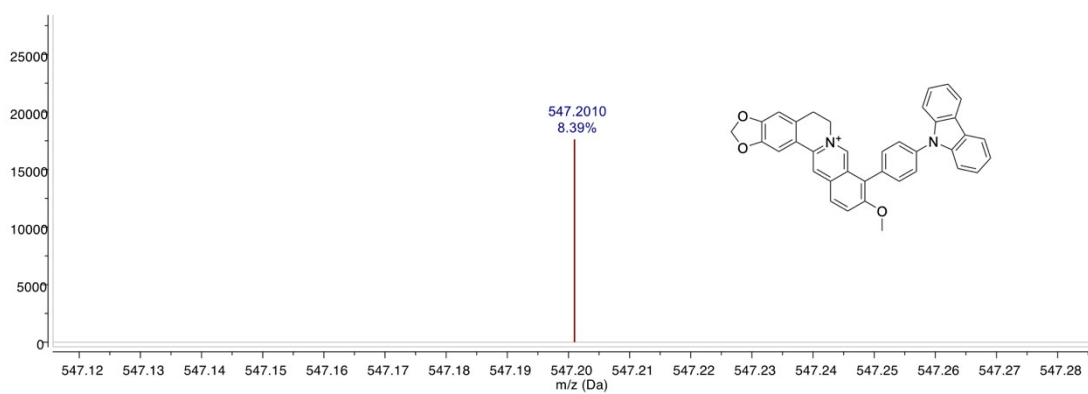

**Figure 63.** HRMS spectrum of **2q**.
